1     **In search of non-coding driver mutations by deep sequencing of**  
2                     **regulatory elements in colorectal cancer**

3     Rebecca C Poulos<sup>1</sup>, Dilmi Perera<sup>1</sup>, Deborah Packham<sup>1</sup>, Anushi Shah<sup>1</sup>, Caroline Janitz<sup>2</sup>, John  
4     E Pimanda<sup>1,3,4</sup>, Nicholas Hawkins<sup>4,5</sup>, Robyn L Ward<sup>1,6</sup>, Luke B Hesson<sup>1</sup> and Jason WH  
5     Wong<sup>1,7\*</sup>

6     <sup>1</sup> Prince of Wales Clinical School and Lowy Cancer Research Centre, UNSW Sydney, NSW,  
7     Australia

8     <sup>2</sup> Next-Generation Sequencing Facility, Office of the Deputy Vice-Chancellor (R&D),  
9     Western Sydney University, Penrith, NSW, Australia

10    <sup>3</sup> Department of Haematology, Prince of Wales Hospital, Sydney, NSW, Australia

11    <sup>4</sup> School of Medical Sciences, UNSW Sydney, NSW, Australia

12    <sup>5</sup> Faculty of Medicine, The University of Queensland, Herston, QLD, Australia

13    <sup>6</sup> Level 3 Brian Wilson Chancellery, The University of Queensland, Herston, QLD, Australia

14    <sup>7</sup> School of Biomedical Sciences, Li Ka Shing Faculty of Medicine, The University of Hong  
15    Kong, Hong Kong Special Administrative Region

16    \* **Corresponding author:** Dr Jason Wong; Level 2 Adult Cancer Program, Lowy Cancer  
17    Research Centre, UNSW Sydney, NS W Australia 2052; email: [jason.wong@unsw.edu.au](mailto:jason.wong@unsw.edu.au).

18

19    **Running title:** In search of regulatory mutations in colorectal cancer

20

21    **Keywords:** colorectal cancer; target capture sequencing; gene regulatory mutations; somatic  
22    mutation; mutational signature.

## 23 **Abstract**

24 Large-scale whole cancer-genome sequencing projects have led to the identification of a  
25 handful of *cis*-regulatory driver mutations in cancer genomes. However, recent studies have  
26 demonstrated that very large cancer cohorts will be required in order to identify low  
27 frequency non-coding drivers. To further this endeavour, in this study, we performed high-  
28 depth sequencing across 95 colorectal cancers and matched normal samples using a unique  
29 target capture sequencing (TCS) assay focusing on over 35 megabases of gene regulatory  
30 elements. We first assessed coverage and variant detection capability from our TCS data, and  
31 compared this with a sample that was additionally whole-genome sequenced (WGS). TCS  
32 enabled substantially deeper sequencing and thus we detected 51% more somatic single  
33 nucleotide variants ( $n = 2,457$ ) and 144% more somatic insertions and deletions ( $n = 39$ ) by  
34 TCS than WGS. Variants obtained from TCS data were suitable for somatic mutational  
35 signature detection, enabling us to define the signatures associated with germline deleterious  
36 variants in *MSH6* and *MUTYH* in samples within our cohort. Finally, we surveyed regulatory  
37 mutations to find putative drivers by assessing variant recurrence and function, identifying  
38 some regulatory variants that may influence oncogenesis. Our study demonstrates TCS to be  
39 a sequencing-efficient alternative to traditional WGS, enabling improved coverage and  
40 variant detection when seeking to identify variants at specific loci among larger cohorts.  
41 Interestingly, we found no candidate variants that have a clear driver function, suggesting that  
42 regulatory drivers may be rare in a colorectal cancer cohort of this size.

43

44

## 45 **Author Summary**

46 In recent years, some cancer research focus has turned towards the role of somatic mutations  
47 in the 98% of the genome that is non-coding. To investigate such mutations, we performed  
48 deep sequencing of regulatory regions and a selection of coding genes across 95 colorectal  
49 cancer and matched-normal samples. To determine the ability of our targeted deep  
50 sequencing methodology to accurately detect variants, we compared our results with those  
51 from a sample that was additionally whole-genome sequenced. We found target capture  
52 sequencing to enable greater sequencing depth, allowing the detection of 51% and 144%  
53 more somatic single nucleotide and insertion/deletion mutations, respectively. Our study here  
54 demonstrates target capture sequencing to be a useful approach for researchers seeking to  
55 identify variants at specific loci among larger cohorts. Our results also enabled the generation  
56 of mutational signatures, implicating deleterious germline single nucleotide variants in  
57 coding exons of *MSH6* and *MUTYH* in samples within our cohort. Finally, we surveyed  
58 regulatory elements in search of somatic cancer driver mutations. We identified some  
59 regulatory variants that may influence oncogenesis, but found no candidate variants with  
60 clear driver function. These findings suggest that regulatory driver mutations may be rare in a  
61 colorectal cancer cohort of this size.

## 62 **Background**

63 In recent years, hundreds of novel cancer driver genes have been characterised  
64 through analyses made possible by the completion of large-scale cancer-genome sequencing  
65 projects. Such genes have been classified as cancer drivers because they harbour frequent  
66 high-impact somatic coding mutations in cancer genomes, with these mutations conferring a  
67 selective advantage to cells in certain tissues-types and resulting in oncogenesis. Identifying  
68 cancer driver mutations outside of protein-coding elements however, has proven to be a  
69 complex task as it can be difficult to assign function to some non-coding mutations (1).  
70 Despite a number of large-scale studies aimed at prioritising either recurrent or functional  
71 mutations (2-4), relatively few somatic driver mutations have yet been discovered in the non-  
72 coding genome. One reason for this apparent sparsity of non-coding drivers is that datasets  
73 are underpowered to detect mutations at low to moderate frequency from the considerable  
74 background of somatic passenger mutations in the cancer genome (5-7).

75 The costs of whole-genome sequencing (WGS) are constantly decreasing, though  
76 performing WGS with sufficient sequencing depth across large cancer cohorts remains  
77 expensive. Whole-exome sequencing (WXS) is a potentially cost-effective sequencing  
78 alternative for large cohorts, allowing researchers to specifically analyse mutations that arise  
79 within protein-coding genes. With the exception of a small proportion of WXS data which  
80 can extend into non-target regions including promoter elements (8), WXS cannot identify  
81 driver mutations which reside in the remaining ~98% of the genome which is non-coding. In  
82 order to refine the potential search area in the non-coding genome, researchers may choose to  
83 focus specifically on variants within regulatory elements, such as promoters and other DNase  
84 I hypersensitive (DHS) sites which are commonly bound by transcription factors. These sites  
85 generally have a greater likelihood of harbouring functional mutations than intergenic

86 regions, as variants at these loci may create or destroy transcription factor binding motifs, or  
87 otherwise impact upon nucleosome occupancy or chromatin marks. Recently, sequencing  
88 data from an assay capturing regulatory elements in addition to protein-coding regions in a  
89 large cohort of breast cancers led to the identification of recurrent somatic mutations in the  
90 promoter of the known cancer driver *FOXAI* (5). Therefore, target capture sequencing (TCS)  
91 focused on regulatory regions could be an alternative to other sequencing methods, allowing  
92 greater cohort sizes, along with increased sequencing depths, at costs comparable to WGS of  
93 far fewer samples.

94 In this study, we perform TCS to generate sequencing data across all promoter  
95 elements and some additional regulatory and coding regions in 95 colorectal cancers and  
96 matched normal samples. We first assess coverage and variant detection capability from our  
97 TCS data, and compare this with a sample that was additionally whole-genome sequenced.  
98 We then apply our TCS data to detect mutational signatures, leading to the identification of  
99 potentially pathogenic germline variants in patients with suspected sporadic CRC. Finally, we  
100 survey somatic mutations in regulatory elements in search of non-coding drivers, finding  
101 recurrent somatic mutations in the promoter of *MTERFD3*, as well as some additional  
102 variants which may be suitable candidates for further investigation.

## 103 **Results**

### 104 *Target capture sequencing coverage and variant detection*

105 We designed a TCS assay encompassing 35,726,928 nucleotides of the genome (**Fig**  
106 **1a; Table S1a**). The assay was designed to focus on regulatory elements, and primarily  
107 covered promoter regions ( $n = 26,455$  regions) which we determined using FANTOM5  
108 annotations (9). We also incorporated a selection of DHS sites ( $n = 13,891$  regions), long  
109 non-coding RNAs (lncRNA;  $n = 842$  regions) and microRNAs (miRNA;  $n = 25$  regions), at

110 sites where we previously observed mutations in other CRC cohorts. Finally, our panel  
111 incorporated coding exons ( $n = 646$  exons;  $n = 39$  genes) of known colorectal cancer-  
112 associated genes (**Table S1b**). With this unique TCS assay, we sequenced 95 colorectal  
113 cancer and matched normal samples randomly selected from a pre-existing biobank (**Table 1**;  
114 **Table S2**). We obtained high sequencing depth in both cancer and matched normal samples  
115 across sequenced regions, with average reads per sequenced base of  $169.96 \pm 25.08$  standard  
116 deviation (S.D.) in the cancer samples, and  $81.91 \pm 17.13$  S.D. (S.D. across 95 samples) in  
117 the matched normal samples (**Fig 1b**).

118 We detected somatic variants using Strelka (10), finding a total of 137,778 single  
119 nucleotide somatic mutations within sequenced regions, with a median of 557 somatic  
120 mutations per cancer sample. The majority of mutations detected were present at low variant  
121 allele frequencies (VAFs; 68% of mutations at  $\leq 8.5\%$  VAF). To ensure that we proceeded  
122 with analyses of only high-confidence mutation calls, we defined a minimum threshold of  $\geq$   
123 8.5% VAF to apply to subsequent analyses (**Fig S1a**). Thus, excluding low VAF mutations,  
124 the total mutation count across our cohort was 43,915 single nucleotide somatic mutations.  
125 Our cancer samples had a median of 178 somatic mutations per sample (**Table S2**), and we  
126 validated a selection of somatic single nucleotide mutations, and a deletion mutation via  
127 Sanger sequencing (see **Methods**; **Fig S1b-c**).

128 We observed similar mutation rates at promoters (median 5.02 mutations per  
129 megabase [mutations/mb]), DHS sites (4.23 mutations/mb), lncRNA and miRNA (median  
130 5.01 mutations/mb), with coding exons more highly mutated (median 13.93 mutations/mb),  
131 consistent with our selection of only known colorectal cancer-associated genes for our TCS  
132 assay (**Fig 1c**; raw counts in **Table S2**). By analysing mononucleotide markers as previously  
133 described (11), we found 16% ( $n = 15$ ) of our cohort to be microsatellite unstable (MSI). Of  
134 the microsatellite stable samples (MSS;  $n = 80$ ), examination of sequencing data revealed that

135 three samples harboured *Polymerase Epsilon (POLE)* exonuclease domain mutations  
136 (CRC\_1: p.Pro286Arg; CRC\_2: p.Met444Lys; CRC\_8: p.Ser297Phe), commonly resulting in  
137 proofreading deficiency and an ultramutator phenotype (12). Mutation loads across our  
138 cohort were generally consistent with previous observations among colorectal cancers (13)  
139 (**Fig 1d**), with overall increasing mutation loads in samples which were MSS, MSI and *POLE*  
140 exonuclease domain mutated, respectively. Our cohort further reflected known subtype  
141 characteristics (14-16), with the MSI samples in our cohort more commonly harbouring  
142 *BRAF V600E* mutations (MSI: 8/15;  $P < 0.0001$  Fisher's exact test), and less commonly  
143 harbouring *APC* truncating mutations (MSI: 2/15;  $P = 0.0209$  Fisher's exact test), than the  
144 *POLE* exonuclease domain wild-type MSS samples (*BRAF V600E* mutation: 4/77; *APC*  
145 truncating mutation: 36/77; **Fig 1d**).

#### 146 *Comparison of target capture and whole-genome sequencing for coverage and variant* 147 *detection*

148 To assess both the coverage and variant detection capability of our TCS dataset, we  
149 selected a sample from our cohort to re-sequence by WGS. We selected the most highly  
150 mutated sample in our cohort (CRC\_1, with *POLE* exonuclease domain mutation) to ensure  
151 that we had large enough numbers of variants for downstream analyses. We performed WGS  
152 at the lower depth more commonly associated with this sequencing method, with read  
153 coverage averaging 63.61 and 14.29 reads per sequenced base in the cancer and matched  
154 normal sample respectively. This coverage was lower than in each of the samples that we  
155 sequenced by TCS (**Fig S2a**). In our WGS cancer dataset, the mode coverage was 55-60  
156 reads per sequenced base (11.29%), and 10-15 reads per sequenced base in the matched  
157 normal sample (34.79%; **Fig 2b**). In our TCS datasets, the mode coverage was  $\geq 100$  reads  
158 per sequenced base in both the cancer (63.76%) and matched normal (35.34%) samples (**Fig**  
159 **2b**). When considering coverage in different region types (**Fig S2b-f**), promoters had

160 somewhat low coverage in both TCS and WGS data, likely due to the high GC content in  
161 these regions which can lead to poorer sequence coverage and greater rates of misalignment  
162 at such loci (5).

163 We next compared the somatic mutations that we identified by TCS and WGS,  
164 analysing only high-confidence mutations from both datasets (that is, mutations with  $\geq 8.5\%$   
165 VAF) within the regions that we incorporated into our TCS assay. We identified 7,311  
166 somatic mutations in CRC\_1 via TCS data, but only 4,854 somatic mutations via WGS data  
167 (**Fig 3a**). Of these mutations, 4,585 were shared between both TCS and WGS datasets (**Fig**  
168 **3a**). Interestingly, despite the difference in the absolute numbers of variants detected, the  
169 mutational signatures for CRC\_1 that were produced using somatic variants from each  
170 sequencing method had a Pearson's correlation coefficient ( $r$ ) of 0.998 ( $P < 0.0001$ ; **Fig 3b**).  
171 Both of these signatures had good correlations with the Catalogue of Somatic Mutations in  
172 Cancer (COSMIC) database's signature 10, which is associated with *POLE* exonuclease  
173 domain mutation (TCS:  $r = 0.785$  and WGS:  $r = 0.768$ ;  $P < 0.0001$ ; **Fig S3a**). These findings  
174 suggest that there was little bias in the trinucleotide composition of the mutations detected by  
175 either sequencing method, with the datasets differing primarily in absolute numbers of  
176 variants.

177 We therefore sought next to investigate why the overall somatic mutation load in  
178 CRC\_1 differed by TCS or WGS. Hypothesising that low sequencing coverage at some loci  
179 might underlie this variation, we examined the sequencing coverage at mutant loci from both  
180 TCS and WGS data. Of the 269 somatic mutations that we identified only via WGS data (**Fig**  
181 **3a**), 47.6% ( $n = 128$ ) had a sequencing depth of  $\leq 10$  reads in either (or both) of the cancer  
182 and matched normal TCS datasets. This is significantly more than in the 4,585 shared somatic  
183 mutations identified in both TCS and WGS datasets (0/4,585 [0%];  $P < 0.0001$  Fisher's exact  
184 test). Similarly, of the 2,726 somatic mutations that we identified only via TCS data (**Fig 3a**),



185 41.6% ( $n = 1,133$ ) had a sequencing depth of  $\leq 10$  reads in either (or both) of the cancer and  
186 matched normal WGS datasets. This too was significantly more than in the 4,585 shared  
187 somatic mutations that we identified in both TCS and WGS data (8/4,585 [0.174%];  $P <$   
188 0.0001 Fisher's exact test). Upon further examination of the sequencing data for the variants  
189 with sequencing depth of  $\leq 10$  reads in WGS data, we found that the low sequencing depth  
190 occurred only in sequencing data from the matched normal WGS sample. Of the remaining  
191 mutations that had a sequencing depth of  $> 10$  reads in both cancer and matched normal  
192 samples, we observed significantly lower coverage at mutant loci in the sequencing dataset  
193 from which the mutation was not detected ( $P < 0.0001$  unpaired  $t$ -test; **Fig S3b-c**). These  
194 findings pinpoint sequencing depth as the primary factor underlying the lack of overlap  
195 amongst variants detected by the differing sequencing methods. Notably, as matched normal  
196 samples are commonly sequenced at lower depths by WGS than the corresponding cancer  
197 sample, our study demonstrates this benefit of TCS – which is the increased sequencing depth  
198 enabled by focusing only on specific genomic loci.

199 We next considered the utility of both TCS and WGS for the detection of insertion  
200 and deletion (indel) mutations. To do so, we applied three indel callers to both datasets:  
201 Strelka (10), SvABA (17) and Lancet (18). Analysing just indels falling into the regions  
202 sequenced by our TCS assay, we found that our TCS data enabled the identification of greater  
203 numbers of indels ( $n = 66$ ) than did WGS data ( $n = 27$ , of which 20 indels were shared by  
204 both datasets; **Fig 3c**). Lancet detected the highest total number of indels across both samples  
205 ( $n = 50$ ), followed by Strelka ( $n = 43$ ) and then SvABA ( $n = 36$ ) (**Fig 3c**). Interestingly, there  
206 was very little overlap between the indels identified by all three variant detectors in the WGS  
207 data (4/27 [15%] common to two indel callers; 0/27 [0%] common to all three indel callers;  
208 **Fig 3d**). In contrast, in the TCS data, 35/66 indels (53%) were common to at least two indel  
209 callers, with 17/66 (26%) identified by all three indel callers (**Fig 3d**). Further, 14/17 (82%)

210 of the indels commonly identified by all three indel callers from the TCS data were among  
211 the 20 indels identified by both WGS and TCS. These findings demonstrate TCS to provide  
212 greater indel detection sensitivity, and suggest that the variants found from TCS data may be  
213 more robust indel calls than those detected by WGS.

#### 214 *Application of TCS-defined mutational signatures to study cancer pathogenesis*

215 We next investigated cancer pathogenesis via our TCS data through analyses of  
216 colorectal cancer subtypes and mutational signatures. We first studied indels detected from  
217 our 95 colorectal cancer samples by Strelka (10), SvABA (17) and Lancet (18). We found  
218 similar numbers of indels to have been detected by each of the three indel callers (Strelka:  $n =$   
219 6,545, SvABA:  $n = 6,603$  and Lancet:  $n = 5,649$  total indels; **Fig 4a**), with 2,664 indels  
220 common to all three variant detectors, and greatest overlap between Strelka and SvABA (total  
221 4,700 indels; **Fig 4a**). Analysing only high confidence indels detected by at least two of these  
222 variant detectors, as expected, we found that MSI samples harboured significantly greater  
223 numbers of indels than MSS samples ( $P < 0.0001$ , unpaired  $t$ -test; **Fig 4b**). We then defined  
224 the mutational signatures for each of the samples in our cohort, using trinucleotide  
225 frequencies that have been normalised to match the trinucleotide context of the whole  
226 genome. We correlated these signatures with known mutational signatures (19) from the  
227 COSMIC database (20, 21). We specifically investigated samples with high correlations with  
228 any known signature, in order to assess the utility of TCS for mutational signature analyses.

229 We observed strong correlations between the mutational signature of CRC\_4 and the  
230 COSMIC database's signatures 14 and 6 ( $r = 0.784$  and  $r = 0.767$ , respectively; and  $P <$   
231 0.0001 by Pearson's correlation; **Fig 4c**). Signature 14 has unknown aetiology but occurs in  
232 cancer samples with high mutation loads (19), consistent with CRC\_4 being the most highly  
233 mutated MSI sample in our cohort ( $n = 1,712$  mutations). Signature 6 has been associated

234 with defective mismatch repair and microsatellite instability (19). Given these findings,  
235 together with the relatively early age of colorectal cancer diagnosis in this patient (51 years,  
236 presenting with synchronous cancers of the rectum and sigmoid), we investigated whether  
237 CRC\_4 exhibited any germline defects in mismatch repair which might suggest a hereditary  
238 cancer predisposition such as Lynch Syndrome. We found CRC\_4 to harbour a germline  
239 heterozygous C>T SNP at chr2:48,030,588. This SNP is within a coding exon of the  
240 mismatch repair gene *MSH6* and results in the introduction of an early stop codon at  
241 p.Arg1068\* (**Fig S4a**), a variant recorded in the InSiGHT database (22) as Class 5  
242 pathogenic. As a potential somatic second hit that may have contributed to cancer  
243 development, CRC\_4 also harbours a somatic *MSH6* truncating G>A mutation at  
244 chr2:48,026,216 (p.Trp365\*). This somatic mutation was present at a VAF of 29%, and loss  
245 of *MSH6* was evident via immunohistochemistry in both resected tumours. CRC\_4  
246 sequencing data exhibited no evidence of *BRAF* V600E mutation, which is additionally  
247 consistent with Lynch Syndrome (23) and further supports the results of our mutational  
248 signature analysis.

249 Our mutational signature analyses also highlighted CRC\_3 for further investigation,  
250 as the mutational signature of this sample was highly correlated with the COSMIC database's  
251 signature 18 ( $r = 0.825$  and  $P < 0.0001$  by Pearson's correlation; **Fig 4d**). This sample was  
252 the third most highly mutated in our cohort ( $n = 2,767$  mutations), which is of particular  
253 interest since CRC\_3 was neither MSI nor *POLE* exonuclease domain mutated. Signature 18  
254 is characterised by high proportions of C>A variants (19), and has been associated with  
255 defects in the base excision repair pathway and *MUTYH* deficiency (24). We found 57% of  
256 somatic mutations in CRC\_3 to be C>A variants, and so we next examined coding exons of  
257 *MUTYH* for deleterious variants. We found no somatic alterations, but instead identified a  
258 heterozygous germline C>T SNP at chr1:45,798,117 (**Fig S4b**). This variant has an allele

259 frequency of  $1.339 \times 10^{-4}$  in the Exome Aggregation Consortium (ExAC) database (25), and it  
260 causes a non-synonymous amino acid change in *MUTYH* (p.Arg242His) which has been  
261 shown *in vitro* to lead to severely defective glycosylase and DNA binding activity (26).  
262 While CRC\_3 exhibited no clinicopathological features of *MUTYH*-Associated Polyposis  
263 (MAP), the association with signature 18 suggests that *MUTYH* alteration by some  
264 alternative or additional pathway may have contributed to cancer development in this patient.  
265 Our cohort also contained another three samples which had  $r > 0.75$  by Pearson's correlation  
266 between their mutational signatures and signature 18 (**Fig S4c**). These samples each had  
267 higher mutation loads than the median for MSS samples (median  $n = 162$  total mutations), as  
268 well as a high proportion of C>A mutations (CRC\_19:  $n = 450$  total mutations with 50%  
269 C>A; CRC\_20:  $n = 393$  total mutations with 43% C>A; and CRC\_26:  $n = 297$  total  
270 mutations with 53% C>A). However, we found no germline non-synonymous variants in  
271 *MUTYH* that were unique to these samples, nor any somatic *MUTYH* mutations. Our findings  
272 suggest that these samples may possess larger structural variation affecting *MUTYH* that we  
273 are unable to detect via TCS, or that instead some other base excision repair deficiency that  
274 would be evident only by examining loci outside of our sequenced regions.

275         The final signature association that we investigated in detail was between the  
276 mutational signature of CRC\_16 and the COSMIC database's signature 16 ( $r = 0.754$  and  $P <$   
277  $0.0001$  by Pearson's correlation; **Fig 4e**). CRC\_16 is a MSS colorectal cancer with a mutation  
278 load equivalent to some MSI tumours ( $n = 813$  mutations; **Fig 1d**). Recent research suggests  
279 that signature 16 in esophageal squamous cell carcinoma may be associated with alcohol  
280 intake (27), though signature 16 has primarily been observed in liver cancers and its aetiology  
281 remains unconfirmed (19). We found no germline SNPs unique to CRC\_16 in any of the  
282 exons of the colorectal cancer genes that we sequenced, suggesting that if a germline

283 alteration does explain this signature association, it too may lie outside of our sequenced  
284 regions.

285 In summary, we found that mutational signatures defined only by TCS data that  
286 covers a limited portion of the genome can still be sufficient to reveal underlying germline  
287 variants involved in cancer pathogenesis.

### 288 *Regulatory regions harbouring an excess of functional or recurrent somatic variants*

289 Finally, we sought to identify any regulatory regions that might harbour cancer driver  
290 mutations, by examining all somatic single nucleotide and indel variants that we detected  
291 from our TCS dataset. To assess the accumulation of functional somatic variants, we applied  
292 OncodriveFML (28) to our variants across all sequenced regions listed in **Table S1a**. We first  
293 analysed just coding regions of the colorectal cancer driver genes that we sequenced (**Table**  
294 **S1b**), and found many of these genes to be enriched for functional mutations. *APC*, *KRAS*  
295 and *TP53* were the most significantly enriched for functional variants when compared with  
296 the expected background mutation load for each gene (**Fig 5a**). In search of regulatory driver  
297 mutations, we next excluded coding regions, and used the remaining variants as input for  
298 OncodriveFML (28). However, we did not find any regions to be enriched for functional  
299 variants in our cohort (**Fig 5b**).

300 Assigning function to a non-coding variant can be imprecise due to the variety of  
301 ways in which a variant can impact upon gene regulation (1), which can be difficult to  
302 capture via a single measure. Hence, in addition to our analyses of functional enrichment in  
303 genomic regions via OncodriveFML (28), we also considered base pair recurrence of somatic  
304 variants in our cohort. To increase our sample sizes, and to exclude variants which were  
305 unique to only our TCS cohort ( $n = 95$  samples), we also incorporated single nucleotide  
306 variants from WGS colon cancer samples from The Cancer Genome Atlas (TCGA;  $n = 46$

307 samples, **Table S3**) into our analyses. We then selected single nucleotide variants that were  
308 present in  $\geq 4$  samples across cohorts, and at least one TCGA and TCS sample each.  
309 Excluding any variants within coding regions of the driver genes that we sequenced, we  
310 found 82 recurrent somatic single nucleotide variants (**Table S4**). To prioritise this list for  
311 mutations that are more likely to be functional, we annotated these variants using FunSeq2  
312 (29). FunSeq2 annotated 43 of these variants as candidate functional mutations, selected via a  
313 high non-coding variant score or an association with any cancer genes (Fu et al., 2014). The  
314 15 mutations with the highest non-coding variant scores are shown in **Table 2**, with the  
315 remaining variants listed in **Table S4**. This list of putative functional mutations includes  
316 mutations with proximity to cancer related genes such as *JUN*, *CDKN1B* and *ASF1A* (**Table**  
317 **2**). The transcription factor binding motif that was most commonly disrupted by the  
318 mutations listed in **Table 2** is that for *E2F1* ( $n = 5/15$  mutations). The E2F1 protein  
319 recognises a binding site consisting of a “CGCGC” DNA sequence (30), in which mutations  
320 may more commonly arise as repetitive DNA sequences tend to be more mutagenic.

321 We next investigated recurrent indel mutations, selecting only indels which had been  
322 detected by at least two variant detectors for these analyses, as they are less likely to be false  
323 positives. We measured indel recurrence within windows spanning 20 base pairs (bp;  $\pm 10$  bp)  
324 so that we could detect regions commonly targeted by indels which can span multiple  
325 nucleotides. Analysing only indels in our TCS cohort, we selected genomic windows which  
326 harboured  $\geq 4$  indels, or windows harbouring  $\geq 3$  indels if at least one of the samples  
327 harbouring the recurrent indels was MSS. (Recurrent indels arising in both MSS and MSI  
328 samples may be more likely to have arisen because they confer a selective advantage, rather  
329 than due to a common mutational process such as microsatellite instability). Excluding indels  
330 within coding regions of any of the driver genes that we sequenced, we identified 15  
331 windows ranging in size from 21 bp to 28 bp, which harboured a total of 62 indels (**Table**

332 **S5**). We sought to prioritise these indels for further investigation by considering their  
333 potential impact on transcription factor binding. We ranked indels which lay within  
334 transcription factor binding sites, using chromatin immunoprecipitation (ChIP-seq) data and  
335 Factorbook annotations (31) from the Encyclopedia of DNA Elements (ENCODE) database  
336 (32). The two windows which we found to be the most highly transcription factor-occupied  
337 regions were chr15:45,003,769-45,003,795 (indels overlapping a maximum of 71  
338 transcription factor ChIP-seq annotations;  $n = 4$  indels) and chr12:107,380,956-107,380,983  
339 (indels overlapping a maximum of 46 transcription factor ChIP-seq annotations;  $n = 3$   
340 indels). The former region on chromosome 15 lies within the first exon of *B2M*, and the  
341 variants found in our cohort disrupt a repetitive ‘CTCTCTCTT’ motif within a protein-  
342 coding region, and they occurred exclusively in MSI tumours. Indels within exons of *B2M*  
343 have already been reported in MSI colorectal cancers, and have been proposed to be involved  
344 in colorectal cancer progression (33). Indels in the latter region on chromosome 12 have not  
345 previously been described to our knowledge, and we validated all three indels via Sanger  
346 sequencing (**Fig S5a**). The region lies within a putative promoter for the mitochondrial  
347 transcription termination factor (mTERF) *MTERFD3* (**Fig 5c**). The indels in our cohort  
348 overlap Factorbook (31) binding sites for transcription factors *SPI/SP2*, *E2F4/E2F6* and  
349 *MAZ* (**Fig S5b**). Further analysis is limited by the fact that we do not have sample-specific  
350 transcriptomic or epigenomic datasets available for each sample in our cohort. However,  
351 using data from the colorectal cancer cell line HCT-116, we observed *MTERFD3* expression  
352 via RNA sequencing, as well as *SPI* ChIP-seq reads overlapping these indel loci (**Fig S5b**).  
353 We also observed *E2F6* and *MAZ* ChIP-seq reads overlapping these indel loci in the HeLa  
354 cervical cancer cell line, for which ChIP-seq data in HCT-116 cells were not available (**Fig**  
355 **S5b**). Overexpression of *MTERFD3* and other mTERF family proteins is associated with  
356 mitochondrial DNA (mtDNA) copy number depletion (34) and mtDNA copy number

357 variation has been observed in cancer tissues (35). However, experimental functional  
358 validation will be required to determine whether these indels might contribute toward  
359 oncogenesis through such a capacity.

## 360 **Discussion**

361 Over recent years, many recurrent mutations have been identified within *cis*-  
362 regulatory regions of cancer genomes, but few drivers have yet been found. This sparsity of  
363 non-coding driver mutations may have arisen due to current studies being underpowered to  
364 pinpoint drivers present at low to moderate frequencies (5-7). We undertook this study in part  
365 to determine whether TCS may enable researchers to increase cohort sizes when seeking to  
366 identify driver mutations in defined regions of the genome. We performed WGS at ~60X  
367 coverage genome-wide, requiring approximately 900 million 100 bp paired-end reads. Our  
368 TCS analyses would have required only 30 million 100 bp paired-end reads per sample  
369 (sequencing 35 mb at ~170x), assuming that sequence coverage is only across targeted  
370 regions. Therefore, TCS could potentially boost sample sizes by almost 30 fold, whilst also  
371 increasing sequencing depth by three fold. By increasing sequencing depth, we identified  
372 51% ( $n = 2,457$ ) and 144% ( $n = 39$ ) more single nucleotide variants and indels, respectively.  
373 Therefore, we find TCS to be a sequencing-efficient method to answer specific research  
374 questions in large cohorts.

375 Despite the benefits of TCS that we have demonstrated however, certain limitations  
376 upon downstream analyses should be noted from this approach. For example, while we were  
377 able to associate CRC\_4 and CRC\_3 with deleterious germline variants in *MSH6* and  
378 *MUTYH* respectively, we were unable to fully investigate the underlying cause of the high  
379 mutation load in MSS sample CRC\_16, nor the associations that we observed between the  
380 additional MSS samples in our cohort and signature 18. The causes of these distinct mutation



381 loads may be a large-scale structural rearrangements, or smaller variants in other regions of  
382 the genome, that we were unable to investigate without further sequencing. TCS is likely to  
383 be unsuitable for such investigations of a more exploratory nature where researchers may  
384 need to extend analyses into regions of the genome not initially included in a TCS assay.  
385 Further, some non-coding driver mutations create *de novo* promoter and enhancer regions  
386 affecting important cancer-associated genes (36-38). Therefore, another limitation of TCS for  
387 non-coding driver detection is that any somatically-acquired regulatory regions that harbour  
388 driver mutations could remain undetected, as these regions may not have been selected for  
389 inclusion into a TCS assay. This limitation applies to this current study, as the DHS regions  
390 sequenced were selected using only a single colorectal cancer cell line.

391         A number of factors can impact the determination of the driver status of a non-coding  
392 mutation. For example, there are a plethora of ways in which a non-coding mutation may  
393 impact genome function. For example, a mutation may alter a transcription factor binding  
394 site, affect the partitioning of the genome into topologically-associating domains, or cause  
395 epigenetic changes by altering the binding of pioneer factors, nucleosome positioning,  
396 chromatin organisation or CpG methylation (1). In this study, we have proposed a list of  
397 single nucleotide variants and genomic windows containing recurrent indels, which may be  
398 functional mutations in the non-coding genome. We did so by using measures of recurrence,  
399 FunSeq2 score (29), and annotations of transcription factor binding. It is possible that others  
400 of the recurrent mutations that we identified are actually cancer drivers that impact the  
401 genome in a way that is not captured by these analytical methods. It is also possible that  
402 many of the mutations that we have selected as potentially functional are actually passenger  
403 mutations, and therefore do not act as drivers in colorectal cancer. In our study, we did not  
404 find any strong candidate regulatory driver mutations, and so we did not perform any further  
405 experimental validation. Ultimately, in order to identify which variants are true cancer driver

406 events, experimental validation of robust putative cancer drivers will be necessary. Currently,  
407 experimental validation of this kind is limited by the difficulties involved in designing a cost-  
408 effective and high-throughput approach to assess the functional impact of large numbers of  
409 non-coding mutations, especially given the many ways in which a mutation may alter gene  
410 regulation.

411 Notably, we did not find any non-coding regions which harboured an excess of  
412 functional variants via OncodriveFML (28). Our cohort may be underpowered to detect low  
413 frequency driver mutations, which may not significantly stand out from among the  
414 background of passenger mutations. Alternatively, poor sequence coverage at some  
415 regulatory elements may mean that certain mutations remain undetected. However, it is also  
416 possible that the regulatory regions that we sequenced are actually relatively devoid of driver  
417 mutations in colorectal cancer, making such events somewhat rare. Interestingly, colorectal  
418 cancers do exhibit relatively low numbers of mutations in many regulatory regions such as  
419 promoters (39, 40). Mutation loads in colorectal cancer closely follow levels of DNA  
420 methylation, and regulatory elements such as these are generally lowly methylated (40).  
421 Since regulatory elements in colorectal cancer accumulate somewhat fewer mutations, it is  
422 possible that such regions are subsequently less likely to develop cancer drivers. It may be the  
423 case that non-coding driver mutations affecting gene regulation in colorectal cancer are rare  
424 in cohorts of this size.

## 425 **Conclusions**

426 Taken together, our study has demonstrated TCS to be a sequencing-efficient  
427 alternative to traditional WGS analyses when seeking to identify variants at specific loci  
428 among larger cohorts. We found that the increased sequencing depth afforded by TCS allows  
429 for improved detection of single nucleotide and indel variants, and we demonstrated the

430 utility of TCS for mutational signature analyses. By assessing variant recurrence and  
431 function, we proposed some regulatory mutations that may be functional, potentially  
432 warranting investigation into whether they play a role in oncogenesis. However, we did not  
433 find any strong candidate regulatory driver mutations in the regions that we sequenced,  
434 suggesting that with our current sample size, such mutations may be rare.

## 435 **Materials and Methods**

### 436 *Target capture sequencing assay design and analysis of sequencing data*

437 A unique TCS assay was designed to provide sequencing data covering regulatory  
438 regions and some coding exons, encompassing almost 36 million nucleotides of the genome  
439 (regions listed in **Table S1a**). Promoter elements were selected to primarily include the  
440 region  $\pm 450$  bp of FANTOM5 p1 promoters of canonical genes (9). DHS sites were selected  
441 using HCT-116 DHS sequencing (DNase-seq) hotspot data (Gene Expression Omnibus  
442 [GEO] accession: GSM736493). lncRNA, miRNA and DHS sites were prioritised for  
443 inclusion into the TCS assay if they were previously recorded to be mutated in other  
444 colorectal cancers samples available from TCGA, with further priority given to lncRNAs that  
445 were expressed in colon tissue (41). Coding genes included in the TCS assay (**Table S1b**) are  
446 from known colorectal cancer driver genes based in part on gene lists from the COSMIC  
447 Cancer Census (20, 21).

448 95 colorectal cancer and matched normal samples were selected from a pre-existing  
449 biobank, and were unbiased for gender, cancer stage or tumour location (**Table 1, Table S2**).  
450 Fresh tumour tissue had been obtained from surgical resection specimens at St. Vincent's  
451 Hospital, Sydney (ethics numbers H00/022 and 00113). Samples were sequenced using our  
452 TCS assay by the Next Generation Sequencing Facility at Western Sydney University, and  
453 WGS was additionally performed on a single sample (CRC\_1). The TCS was performed

454 using the the Roche NimbleGen SeqCap EZ Exome Library SR platform, version 4.2. The  
455 WGS library was prepared with the TruSeq DNA PCR-Free Sample Prep Kit with a 350bp  
456 insert size. Both TCS and WGS libraries were sequenced using a 2x101 paired-end read  
457 length on the HiSeq 2500. Raw sequencing data has been deposited in European Genome-  
458 phenome Archive (EGA) under accession number [data deposition in progress].

459         Raw 101 bp paired-end sequencing reads as fastq files were trimmed using Trim  
460 Galore! (<https://github.com/FelixKrueger/TrimGalore>) to remove 10 bp at the 3' end of reads  
461 for the TCS data, and with default parameters for the WGS data. Reads were aligned against  
462 assembled chromosomes of hg19 using Burrows-Wheeler Alignment (BWA) mem (42) with  
463 default parameters. Files were sorted and indexed with samtools (43) and read groups were  
464 added using Picard (<https://github.com/broadinstitute/picard>). When analysing the WGS data,  
465 an additional duplicate removal step was included via the samtools (43) 'rmdup' tool with  
466 default parameters. Coverage statistics were calculated using samtools (43) 'depth' tool  
467 across sequenced regions.

468         Somatic single nucleotide variant calls for TCGA colon cancer samples with WGS  
469 were processed as previously described (39) (see **Table S3** for sample names). MSI was  
470 designated if the sample was listed as being MSI high (MSI-H) via annotations from TCGA.

#### 471 *Variant detection and analyses*

472         Germline variants were detected using the GATK pipeline (44), and were visualised  
473 in figures using the Integrative Genomics Viewer (IGV) (45, 46) with the BAM files  
474 described above. For the identification of somatic single nucleotide and indel mutations,  
475 BAM files were additionally filtered to exclude reads which mapped to multiple loci by  
476 removing reads marked with the "XA:Z:" and "SA:Z:" flags. Somatic single nucleotide  
477 variants were detected with Strelka (10), using the bwa configuration file and default

478 parameters, with the exception of the ‘no depth filters’ option which was selected for  
479 analysis of TCS data. VAFs were calculated using bam-readcount  
480 (<https://github.com/genome/bam-readcount>), with default parameters. The violin plot  
481 incorporating the VAFs of somatic mutations was created in R using ggplot2 (47). Somatic  
482 indels were detected using Strelka (10) with parameters as described above, as well as  
483 SvABA (17) and Lancet (18) with default parameters. Segments of assembled chromosomes  
484 which had high sequence homology with unplaced scaffolds of hg19 were identified using  
485 GMAP (48), and somatic single nucleotide and indel mutations that were within such loci  
486 were excluded. Somatic and germline variants were annotated with Annovar (49), to detect  
487 any protein-coding alterations.

488 Mutational signatures (19) were identified through Pearson’s correlation of  
489 trinucleotide frequencies in a given sample with those from the COSMIC ‘Signatures of  
490 Mutational Processes in Human Cancer’ database (20, 21). Mutational signatures from TCS  
491 were normalised against those from the COSMIC database using genome trinucleotide  
492 frequencies (“tri.counts.genome”) obtained from the deconstructSigs R package (50). All  
493 Pearson’s correlations reported had  $P < 0.0001$ , indicating a correlation coefficient that is  
494 significantly different from zero.

495 MSI status was determined by analysing mononucleotide repeats, as these sites are  
496 error-prone and are typically repaired by the mismatch repair process that becomes deficient  
497 in MSI tumours. The mononucleotide markers used were Bat25, Bat26, Bat40 and Cat25, as  
498 described previously (11). *POLE* exonuclease domain mutant cancers were identified through  
499 manual examination of sequencing data using IGV (45, 46) across the exonuclease domain of  
500 *POLE* (amino acids 268-471). This was done for all samples with a somatic exonuclease  
501 domain mutation detected by Strelka (10) and/or  $r \geq 0.75$  by Pearson’s correlation with  
502 signature 10. (All samples with  $r \geq 0.75$  by Pearson’s correlation with signature 10 did

503 harbour a *POLE* exonuclease domain mutation, and all mutations detected by Strelka (10)  
504 were confirmed as somatic via IGV).

505 *Analysis of regulatory variants for functional or putative driver role*

506 Analyses involving OncodriveFML (version 2.1.0) (28) incorporated both somatic  
507 single nucleotide and indel mutations, with ‘targeted’ set as the type of sequencing. The tool  
508 was run for coding variants with ‘coding’ set as the type of genomic element (strand provided  
509 for coding genes), and was run for all variants with ‘noncoding’ set as the type of genomic  
510 element (no strand provided for non-coding regions). All parameters were set to the default,  
511 with the exception of the following signatures parameters: method set to ‘bysample’,  
512 only\_mapped\_mutations set to ‘TRUE’ and normalize\_by\_sites set to “whole\_genome”.

513 FunSeq2 (version 2.1.6) (29) was used to annotate somatic single nucleotide  
514 mutations (with no evaluation of recurrence), with the minor allele frequency threshold set to  
515 ‘1’ and the maximum length cut-off for indel analyses set to ‘inf’. For variants with different  
516 alternate nucleotides between TCS and TCGA cohorts, the alternate nucleotide from the TCS  
517 cohort was selected for analysis via FunSeq2. UCSC Genome Browser (51) screenshots show  
518 gene predictions via the “UCSC Genes” track. Sequencing data tracks shown in figures have  
519 GEO accession numbers as follows: RNA-sequencing (RNA-seq) in HCT-116 cells  
520 (GSM958749); H3K4me3 ChIP-seq in HCT-116 cells (GSM945304); DNase-seq in HCT-  
521 116 (GSM736600, GSM736493); *SPI* ChIP-seq in HCT116 cells (GSM1010902); and ChIP-  
522 seq in HeLa-S3 cells for *E2F4* (GSM935365), *E2F6* (GSM935476) and *MAZ* (GSM935272),  
523 for which ChIP-seq data in HCT-116 cells were not available.

524

## 525 *Experimental validation of variants detected*

526           Some somatic mutations were randomly selected for experimental validation via  
527 Sanger sequencing of polymerase chain reaction (PCR) product amplified from cancer and  
528 matched normal patient DNA. Sanger sequencing was performed by the Ramaciotti Centre  
529 for Genomics at the University of New South Wales (UNSW Sydney). Validation was  
530 possible for single nucleotide somatic mutations present at > 20% VAF. Mutations at lower  
531 VAFs were likely unable to be validated due to the technical limitations of this sequencing  
532 method from bulk PCR product. Indels in the putative promoter of *MTERFD3* were also  
533 validated as described here.

## 534 **Financial support**

535           This work was funded by Cancer Institute NSW (13/DATA/1-02) and the Cure  
536 Cancer Foundation Australia with the assistance of Cancer Australia, through the Priority-  
537 driven Collaborative Cancer Research Scheme (APP1057921) to J.W.H.W. J.W.H.W. is  
538 supported by an Australian Research Council Future Fellowship (FT130100096) and R.C.P is  
539 supported by an Australian Government Research Training Program Scholarship. J.E.P. is  
540 funded by the National Health and Medical Research Council (Australia).

## 541 **Conflicts of interest**

542           The authors declare no competing interest.

## 543 **Authors' contributions**

544           **Project planning and design:** J.E.P., N.H., R.L.W., L.B.H. and J.W.H.W.

545 **Experimental analysis:** R.C.P., D. Packham and C.J. **Data analysis:** R.C.P., D. Perera, A.S.

546 and J.W.H.W. **Manuscript writing and figures:** R.C.P. and J.W.H.W. All authors reviewed  
547 and edited the final manuscript.

## 548 **Acknowledgements**

549 The authors thank TCGA and other groups who have made their data available for  
550 public analysis, and additionally thank Intersect Pty Ltd for providing high-performance  
551 computing resources and data storage used in this study.

## 552 **Data access**

553 Please contact authors.

554



## 555 **List of Abbreviations**

|     |             |                                                  |
|-----|-------------|--------------------------------------------------|
| 556 | bp          | - Base pairs                                     |
| 557 | BWA         | - Burrows Wheeler Aligner                        |
| 558 | ChIP-seq    | - Chromatin immunoprecipitation sequencing       |
| 559 | COSMIC      | - Catalogue of Somatic Mutations in Cancer       |
| 560 | DHS         | - DNase I hypersensitivity                       |
| 561 | DNase-seq   | - DNase I hypersensitivity sequencing            |
| 562 | ENCODE      | - Encyclopedia of DNA Elements                   |
| 563 | GEO         | - Gene Expression Omnibus                        |
| 564 | IGV         | - Integrative Genomics Viewer                    |
| 565 | Indel       | - Insertion and deletion                         |
| 566 | lncRNA      | - Long non-coding RNA                            |
| 567 | mb          | - megabase                                       |
| 568 | miRNA       | - MicroRNA                                       |
| 569 | MSI         | - Microsatellite instability                     |
| 570 | MSS         | - Microsatellite stable                          |
| 571 | mtDNA       | - mitochondrial DNA                              |
| 572 | mTERF       | - Mitochondrial transcription termination factor |
| 573 | PCR         | - Polymerase chain reaction                      |
| 574 | <i>POLE</i> | - <i>Polymerase epsilon</i>                      |
| 575 | RNA-seq     | - Ribonucleic acid sequencing                    |
| 576 | S.D.        | - Standard deviation                             |
| 577 | TCGA        | - The Cancer Genome Atlas                        |
| 578 | TCS         | - Target capture sequencing                      |
| 579 | VAF         | - Variant allele frequency                       |
| 580 | WGS         | - Whole-genome sequencing                        |
| 581 | WXS         | - Whole exome sequencing                         |

582

## 583 **References**

- 584 1. Poulos RC, Wong JWH. *cis*-Regulatory Driver Mutations in Cancer Genomes. eLS: John Wiley  
585 & Sons, Ltd; 2017. p. 1–10.
- 586 2. Melton C, Reuter JA, Spacek DV, Snyder M. Recurrent somatic mutations in regulatory  
587 regions of human cancer genomes. *Nat Genet.* 2015;47(7):710-6.
- 588 3. Fredriksson NJ, Ny L, Nilsson JA, Larsson E. Systematic analysis of noncoding somatic  
589 mutations and gene expression alterations across 14 tumor types. *Nat Genet.* 2014;46:1258-63.
- 590 4. Weinhold N, Jacobsen A, Schultz N, Sander C, Lee W. Genome-wide analysis of noncoding  
591 regulatory mutations in cancer. *Nat Genet.* 2014;46.
- 592 5. Rheinbay E, Parasuraman P, Grimsby J, Tiao G, Engreitz JM, Kim J, et al. Recurrent and  
593 functional regulatory mutations in breast cancer. *Nature.* 2017;547(7661):55-60.
- 594 6. Lawrence MS, Stojanov P, Mermel CH, Robinson JT, Garraway LA, Golub TR. Discovery and  
595 saturation analysis of cancer genes across 21 tumour types. *Nature.* 2014;505:495-501.
- 596 7. Lawrence MS, Stojanov P, Polak P, Kryukov GV, Cibulskis K, Sivachenko A, et al. Mutational  
597 heterogeneity in cancer and the search for new cancer-associated genes. *Nature.*  
598 2013;499(7457):214-8.
- 599 8. Guo Y, Long J, He J, Li C-l, Cai Q, Shu X-O, et al. Exome sequencing generates high quality  
600 data in non-target regions. *BMC genomics.* 2012;13(1):194.
- 601 9. The FANTOM Consortium and the RIKEN PMI and CLST (DGT). A promoter-level mammalian  
602 expression atlas. *Nature.* 2014;507(7493):462-70.
- 603 10. Saunders CT, Wong WS, Swamy S, Becq J, Murray LJ, Cheetham RK. Strelka: accurate somatic  
604 small-variant calling from sequenced tumor-normal sample pairs. *Bioinformatics.* 2012;28(14):1811-  
605 7.
- 606 11. Hawkins NJ, Ward RL. Sporadic colorectal cancers with microsatellite instability and their  
607 possible origin in hyperplastic polyps and serrated adenomas. *Journal of the National Cancer*  
608 *Institute.* 2001;93(17):1307-13.
- 609 12. Rayner E, van Gool IC, Palles C, Kearsey SE, Bosse T, Tomlinson I, et al. A panoply of errors:  
610 polymerase proofreading domain mutations in cancer. *Nature reviews Cancer.* 2016;16(2):71-81.
- 611 13. The Cancer Genome Atlas Research Network. Comprehensive molecular characterization of  
612 human colon and rectal cancer. *Nature.* 2012;487(7407):330-7.
- 613 14. Rowan AJ, Lamlum H, Ilyas M, Wheeler J, Straub J, Papadopoulou A, et al. APC mutations in  
614 sporadic colorectal tumors: A mutational “hotspot” and interdependence of the “two hits”. *Proc Natl*  
615 *Acad Sci U S A.* 2000;97(7):3352-7.
- 616 15. Shen L, Toyota M, Kondo Y, Lin E, Zhang L, Guo Y, et al. Integrated genetic and epigenetic  
617 analysis identifies three different subclasses of colon cancer. *Proc Natl Acad Sci U S A.*  
618 2007;104(47):18654-9.
- 619 16. Rajagopalan H, Bardelli A, Lengauer C, Kinzler KW, Vogelstein B, Velculescu VE.  
620 Tumorigenesis: RAF/RAS oncogenes and mismatch-repair status. *Nature.* 2002;418(6901):934.
- 621 17. Wala J, Bandopadhyay P, Greenwald N, O'Rourke R, Sharpe T, Stewart C, et al. Genome-  
622 wide detection of structural variants and indels by local assembly. *bioRxiv.*  
623 2017:<https://doi.org/10.1101/105080>.
- 624 18. Narzisi G, Corvelo A, Arora K, Bergmann E, Shah M, Musunuri R, et al. *Lancet*: genome-wide  
625 somatic variant calling using localized colored DeBruijn graphs. *bioRxiv.*  
626 2017:<https://doi.org/10.1101/196311>.
- 627 19. Alexandrov LB, Nik-Zainal S, Wedge DC, Aparicio SAJR, Behjati S, Biankin AV, et al. Signatures  
628 of mutational processes in human cancer. *Nature.* 2013;500(7463):415-21.
- 629 20. Forbes SA, Beare D, Gunasekaran P, Leung K, Bindal N, Boutselakis H, et al. COSMIC:  
630 exploring the world's knowledge of somatic mutations in human cancer. *Nucleic Acids Res.*  
631 2015;43(Database issue):D805-11.

- 632 21. Forbes SA, Bindal N, Bamford S, Cole C, Kok CY, Beare D, et al. COSMIC: mining complete  
633 cancer genomes in the Catalogue of Somatic Mutations in Cancer. *Nucleic Acids Res.* 2011;39:D945-  
634 50.
- 635 22. Plazzer JP, Sijmons RH, Woods MO, Peltomaki P, Thompson B, Den Dunnen JT, et al. The  
636 InSiGHT database: utilizing 100 years of insights into Lynch syndrome. *Familial cancer.*  
637 2013;12(2):175-80.
- 638 23. Deng G, Bell I, Crawley S, Gum J, Terdiman JP, Allen BA, et al. BRAF mutation is frequently  
639 present in sporadic colorectal cancer with methylated hMLH1, but not in hereditary nonpolyposis  
640 colorectal cancer. *Clinical cancer research : an official journal of the American Association for Cancer*  
641 *Research.* 2004;10(1 Pt 1):191-5.
- 642 24. Pilati C, Shinde J, Alexandrov LB, Assié G, André T, Hélias-Rodzewicz Z, et al. Mutational  
643 signature analysis identifies MUTYH deficiency in colorectal cancers and adrenocortical carcinomas.  
644 *The Journal of pathology.* 2017;242(1):10-5.
- 645 25. Lek M, Karczewski KJ, Minikel EV, Samocha KE, Banks E, Fennell T, et al. Analysis of protein-  
646 coding genetic variation in 60,706 humans. *Nature.* 2016;536(7616):285-91.
- 647 26. Ali M, Kim H, Cleary S, Cupples C, Gallinger S, Bristow R. Characterization of mutant MUTYH  
648 proteins associated with familial colorectal cancer. *Gastroenterology.* 2008;135(2):499-507.
- 649 27. Chang J, Tan W, Ling Z, Xi R, Shao M, Chen M, et al. Genomic analysis of oesophageal  
650 squamous-cell carcinoma identifies alcohol drinking-related mutation signature and genomic  
651 alterations. *Nat Commun.* 2017;8:15290.
- 652 28. Mularoni L, Sabarinathan R, Deu-Pons J, Gonzalez-Perez A, López-Bigas N. OncodriveFML: a  
653 general framework to identify coding and non-coding regions with cancer driver mutations. *Genome*  
654 *biology.* 2016;17(1):128.
- 655 29. Fu Y, Liu Z, Lou S, Bedford J, Mu XJ, Yip KY, et al. FunSeq2: a framework for prioritizing  
656 noncoding regulatory variants in cancer. *Genome biology.* 2014;15(10):480.
- 657 30. Saadeh H, Schulz R. Protection of CpG islands against de novo DNA methylation during  
658 oogenesis is associated with the recognition site of E2f1 and E2f2. *Epigenetics Chromatin.* 2014;7:26-  
659 .
- 660 31. Wang J, Zhuang J, Iyer S, Lin XY, Greven MC, Kim BH, et al. Factorbook.org: a Wiki-based  
661 database for transcription factor-binding data generated by the ENCODE consortium. *Nucleic Acids*  
662 *Res.* 2013;41(Database issue):D171-6.
- 663 32. The Encode Project Consortium. An Integrated Encyclopedia of DNA Elements in the Human  
664 Genome. *Nature.* 2012;489(7414):57-74.
- 665 33. Kloor M, Michel S, Buckowitz B, Ruschoff J, Buttner R, Holinski-Feder E, et al. Beta2-  
666 microglobulin mutations in microsatellite unstable colorectal tumors. *Int J Cancer.* 2007;121(2):454-  
667 8.
- 668 34. Hyvarinen AK, Pohjoismaki JL, Holt IJ, Jacobs HT. Overexpression of MTERFD1 or MTERFD3  
669 impairs the completion of mitochondrial DNA replication. *Molecular biology reports.*  
670 2011;38(2):1321-8.
- 671 35. Reznik E, Miller ML, Senbabaoglu Y, Riaz N, Sarungbam J, Tickoo SK, et al. Mitochondrial DNA  
672 copy number variation across human cancers. *eLife.* 2016;5:e10769.
- 673 36. Mansour MR, Abraham BJ, Anders L, Berezovskaya A, Gutierrez A, Durbin AD, et al.  
674 Oncogene regulation. An oncogenic super-enhancer formed through somatic mutation of a  
675 noncoding intergenic element. *Science.* 2014;346(6215):1373-7.
- 676 37. Rahman S, Magnussen M, León TE, Farah N, Li Z, Abraham BJ, et al. Activation of the LMO2  
677 oncogene through a somatically acquired neomorphic promoter in T-cell acute lymphoblastic  
678 leukemia. *Blood.* 2017;129(24):3221-6.
- 679 38. Abraham BJ, Hnisz D, Weintraub AS, Kwiatkowski N, Li CH, Li Z, et al. Small genomic  
680 insertions form enhancers that misregulate oncogenes. *Nat Commun.* 2017;8:14385.

- 681 39. Perera D, Poulos RC, Shah A, Beck D, Pimanda JE, Wong JWH. Differential DNA repair  
682 underlies mutation hotspots at active promoters in cancer genomes. *Nature*. 2016;532(7598):259-  
683 63.
- 684 40. Poulos RC, Olivier J, Wong JWH. The interaction between cytosine methylation and  
685 processes of DNA replication and repair shape the mutational landscape of cancer genomes. *Nucleic  
686 Acids Res*. 2017;45(13):7786-95.
- 687 41. Cabili MN, Trapnell C, Goff L, Koziol M, Tazon-Vega B, Regev A, et al. Integrative annotation  
688 of human large intergenic noncoding RNAs reveals global properties and specific subclasses. *Genes  
689 Dev*. 2011;25:1915-27.
- 690 42. Li H, Durbin R. Fast and accurate short read alignment with Burrows-Wheeler transform.  
691 *Bioinformatics*. 2009;25(14):1754-60.
- 692 43. Li H. The Sequence Alignment/Map format and SAMtools. *Bioinformatics*. 2009;25:2078-2-9.
- 693 44. McKenna A. The Genome Analysis Toolkit: a MapReduce framework for analyzing next-  
694 generation DNA sequencing data. *Genome research*. 2010;20:1297-303.
- 695 45. Robinson JT, Thorvaldsdottir H, Winckler W, Guttman M, Lander ES, Getz G, et al. Integrative  
696 genomics viewer. *Nat Biotech*. 2011;29(1):24-6.
- 697 46. Thorvaldsdóttir H, Robinson JT, Mesirov JP. Integrative Genomics Viewer (IGV): high-  
698 performance genomics data visualization and exploration. *Brief Bioinform*. 2013;14(2):178-92.
- 699 47. Wickham H. *ggplot2: Elegant Graphics for Data Analysis*. New York: Springer International  
700 Publishing; 2016.
- 701 48. Wu TD, Watanabe CK. GMAP: a genomic mapping and alignment program for mRNA and EST  
702 sequences. *Bioinformatics*. 2005;21(9):1859-75.
- 703 49. Wang K, Li M, Hakonarson H. ANNOVAR: functional annotation of genetic variants from high-  
704 throughput sequencing data. *Nucleic Acids Res*. 2010;38(16):e164-e.
- 705 50. Rosenthal R, McGranahan N, Herrero J, Taylor BS, Swanton C. deconstructSigs: delineating  
706 mutational processes in single tumors distinguishes DNA repair deficiencies and patterns of  
707 carcinoma evolution. *Genome biology*. 2016;17:31.
- 708 51. Kent WJ, Sugnet CW, Furey TS, Roskin KM, Pringle TH, Zahler AM, et al. The human genome  
709 browser at UCSC. *Genome research*. 2002;12(6):996-1006.
- 710 52. Kears M, Moir R, Wilson A, Stones-Havas S, Cheung M, Sturrock S, et al. Geneious Basic: an  
711 integrated and extendable desktop software platform for the organization and analysis of sequence  
712 data. *Bioinformatics*. 2012;28(12):1647-9.

713

714

715 **Tables**

716 **Table 1** – Clinicopathological features of the colorectal cancer cohort analysed.

| <b>Characteristic</b>                        | <b>Cohort (<i>n</i> = 95)</b> |
|----------------------------------------------|-------------------------------|
| <b>Age at diagnosis (years; mean ± S.D.)</b> | 68.8 ± 13.8                   |
| <b>Sex [<i>n</i> (%)]</b>                    |                               |
| Male                                         | 54 (57%)                      |
| Female                                       | 41 (43%)                      |
| <b>Location [<i>n</i> (%)]</b>               |                               |
| Colon                                        | 53 (56%)                      |
| Rectum                                       | 42 (44%)                      |
| <b>Tumour stage [<i>n</i> (%)]</b>           |                               |
| Stage I                                      | 31 (33%)                      |
| Stage II                                     | 32 (34%)                      |
| Stage III                                    | 32 (34%)                      |
| <b>MSI status [<i>n</i> (%)]</b>             |                               |
| MSI                                          | 15 (16%)                      |
| MSS                                          | 80 (84%)                      |
| <b>CIMP status [<i>n</i> (%)]</b>            |                               |
| Positive                                     | 12 (13%)                      |
| Negative                                     | 83 (87%)                      |

S.D. = standard deviation; MSI = microsatellite instability; MSS = microsatellite stable; CIMP = CpG Island Methylator Phenotype.

**Table 2** – Non-coding somatic single nucleotide mutations selected as putative cancer drivers, by base pair recurrence and FunSeq2 annotation.

| Mutation                | Recurrence in cohort* |      | % MSI samples | GERP  | ENCODE annotation             | Motif Analysis                                                                                                                                                   |                                                    | Target gene                                                                                                | FunSeq2 Score <sup>^</sup> |
|-------------------------|-----------------------|------|---------------|-------|-------------------------------|------------------------------------------------------------------------------------------------------------------------------------------------------------------|----------------------------------------------------|------------------------------------------------------------------------------------------------------------|----------------------------|
|                         | TCS                   | TCGA |               |       |                               | Break                                                                                                                                                            | Gain                                               |                                                                                                            |                            |
| chr7:112,089,887<br>G>T | 3                     | 1    | 25%           | -     | TFP                           | -                                                                                                                                                                | CCNT2_disc2,<br>ZNF740_2,<br>ZNF740_3,<br>ZNF740_4 | IFRD1 (Intron & Promoter)                                                                                  | 4.54                       |
| chr1:59,250,792<br>G>A  | 3                     | 1    | 100%          | -0.47 | DHS, TFP,<br>TFM              | BCL11A, CCNT2,<br>CTCF, DHS, E2F1,<br>EGR1, ELF1,<br>GABPA, IRF4,<br>MAX, MYC,<br>NFKB1, PAX5,<br>SMARCB1,<br>STAT1, TAF1,<br>TCF12                              | -                                                  | JUN (Promoter) [ <b>cancer related</b> : DNA repair, TF regulating known cancer genes, actionable, cancer] | 3.77                       |
| chr17:29,648,734<br>A>G | 5                     | 1    | 100%          | 1.16  | DHS, TFP,<br>TFM,<br>Enhancer | DHS, FOS, MAX,<br>MYC, TBP                                                                                                                                       | HDAC2_disc6                                        | EVI2A (Promoter & UTR)                                                                                     | 3.75                       |
| chr19:41,221,777<br>C>T | 3                     | 2    | 100%          | -5.51 | DHS, TFP,<br>TFM,<br>Enhancer | DHS, E2F1, ELF1,<br>FOS, FOSL2,<br>GATA2, GTF2F1,<br>JUN, JUND,<br>MAFF, MAFK,<br>NR3C1, RAD21,<br>RFX5, SMARCB1,<br>SMC3, STAT1,<br>STAT3, TCF7L2,<br>USF1, YY1 | -                                                  | ADCK4 (Intron & Promoter)                                                                                  | 3.53                       |
| chr12:12,957,550<br>T>C | 3                     | 1    | 100%          | 0.78  | TFP, TFM,<br>Enhancer         | EBF1, FOS, JUN,<br>JUND, RFX5,<br>SMARCB1,<br>SMARCC1, TBP                                                                                                       | -                                                  | APOLD1 (Intron) CDKN1B (Distal) [ <b>cancer related</b> : DNA repair] DDX47 (Distal)                       | 3.50                       |

|                          |   |   |      |       |                               |                                                            |         |                                                                                                                                          |      |
|--------------------------|---|---|------|-------|-------------------------------|------------------------------------------------------------|---------|------------------------------------------------------------------------------------------------------------------------------------------|------|
| chr4:47,487,706<br>A>T   | 3 | 3 | 100% | -5.57 | TFP, TFM                      | EGR1, MAFK,<br>SPI1                                        | CPEB1_1 | ATP10D (Intron & Promoter)                                                                                                               | 3.25 |
| chr10:104,404,968<br>G>A | 3 | 2 | 60%  | -5.86 | TFP, TFM                      | CTCF, E2F1, TAF1                                           | -       | TRIM8 (Intron & Promoter)                                                                                                                | 3.01 |
| chr4:91,049,669<br>C>T   | 2 | 2 | 25%  | -5.49 | DHS, TFP,<br>TFM,<br>Enhancer | DHS, E2F1, MYC,<br>TCF7L2                                  | -       | CCSER1 (Intron & Promoter)                                                                                                               | 2.79 |
| chr11:94,883,648<br>C>T  | 2 | 3 | 60%  | 0.53  | DHS, TFP,<br>TFM,<br>Enhancer | DHS, E2F1, EP300,<br>FOXA1, GATA1,<br>GATA2, GATA3,<br>MYC | -       | -                                                                                                                                        | 2.79 |
| chr11:128,042,476<br>A>G | 3 | 1 | 100% | -7.78 | TFP, TFM,<br>Enhancer         | CTCF, FOXA1,<br>RAD21, SMC3,<br>ZNF143                     | -       | -                                                                                                                                        | 2.79 |
| chr12:4,253,257<br>C>A   | 3 | 1 | 50%  | -1.65 | DHS, TFP,<br>TFM,<br>Enhancer | CTCF, DHS,<br>RAD21, SETDB1                                | -       | -                                                                                                                                        | 2.79 |
| chr6:119,215,019<br>A>C  | 5 | 1 | 50%  | -0.13 | DHS, TFP                      | -                                                          | FOXP1_1 | ASF1A (Promoter) [ <b>cancer related</b> : DNA repair] MCM9 (Intron)                                                                     | 2.78 |
| chr1:154,917,003<br>A>G  | 3 | 5 | 88%  | -     | DHS, TFP,<br>Enhancer         | -                                                          | -       | ADAR (Distal) CKS1B (Distal)<br>EFNA1 (Distal) PBXIP1 (Distal<br>& UTR) PMVK (Distal)<br>PYGO2 (Distal) SHC1 (Distal)<br>ZBTB7B (Distal) | 2.76 |
| chr2:171,787,498<br>A>C  | 2 | 2 | 100% | 0.37  | DHS, TFP,<br>TFM              | DHS                                                        | -       | GORASP2 (Intron)                                                                                                                         | 2.76 |
| chr6:132,272,732<br>A>G  | 5 | 1 | 100% | -0.80 | TFP,<br>Enhancer              | -                                                          | -       | CTGF (Promoter)                                                                                                                          | 2.70 |

\*TCS cohort is the target capture sequencing cohort described in this publication, containing 95 colorectal cancer samples. TCGA cohort is The Cancer Genome Atlas cohort containing 46 whole-genome sequenced colon cancer samples (**Table S3**).

^ This is the “Non-Coding Score” provided by FunSeq2 (29) via a weighted scoring scheme, where higher values indicate variants that may be more likely to be non-coding drivers.

MSI = microsatellite instability. GERP = Genomic Evolutionary Rate Profiling (GERP), a measure of conservation where higher numbers indicate more conserved sites. ENCODE = Encyclopedia of DNA Elements. TFP = transcription factor binding peak; TFM = transcription factor bound motifs in peak region; DHS = DNase I hypersensitive site.

## Figure Legends

**Figure 1 – Sequencing coverage by target capture sequencing (TCS), and cohort mutation characteristics.** (a) Region types sequenced by TCS. Note that 1,107,019 nucleotides of the total region size falls into more than one region type. (b) Average per sample reads coverage across sequenced bases in cancer and matched normal TCS samples. Read coverage is plotted for each region type, where box plots show mean and standard deviation across samples in the TCS cohort ( $n = 95$ ). Dotted lines mark average read coverage in tumour and matched normal samples across the cohort. (c) Mutations per megabase (mb) in sequenced regions, separated by region type. Dots represent individual samples in the TCS cohort ( $n = 95$ ), and the box plot shows the mean and standard deviation of mutation rates. (d) Mutation rate for each individual sample in the TCS cohort ( $n = 95$ ), plotted on a log scale (y-axis). Colours represent individual colorectal cancer subtypes as indicated, and single nucleotide somatic mutations in certain colorectal cancer driver genes are marked by bars. *Exonuc* = exonuclease domain mutation; *trunc* = truncating mutation; *non-syn* = non-synonymous (includes stop gain and stop loss variants).

**Figure 2 – Read coverage statistics for whole-genome sequencing (WGS) and target capture sequencing (TCS) datasets.** (a) Read coverage per sequenced base in cancer (left) and matched normal (right) samples. Box plot shows mean and standard deviation for all sequenced bases within each region type, where TCS data is pooled across all samples. (b) Percentage of bases with given read coverage in cancer (left) and matched normal (right) samples. Data is separated into bins spanning five reads, where the number on the x-axis indicates the lower edge of the bin (inclusive). Box plot shows actual value in WGS data (blue;  $n = 1$ , CRC\_1), and mean and standard deviation across samples in the TCS cohort (red;  $n = 95$  samples).

**Figure 3 – Comparison of variant detection in CRC\_1 from whole-genome sequencing (WGS) and target capture sequencing (TCS).** (a) Venn diagram showing shared and unique single nucleotide somatic mutations identified from WGS and TCS data. (b) Mutational signature constructed from single nucleotide somatic mutations identified from TCS (top) and WGS (bottom) data. (c) Venn diagram showing numbers of somatic insertions and deletions (indels) identified from WGS and TCS data (solid lines). Venn diagrams indicating numbers of indels identified by different variant detectors are also shown (dotted lines). (d) Venn diagrams showing numbers of indels identified by different variant detectors using either WGS or TCS data. All data shown is for colorectal cancer sample CRC\_1.



**Figure 4 – Subtype and mutational signature detection among target capture sequencing (TCS) cohort.** (a) Total numbers of insertions and deletions (indels) identified by different variant detectors, pooled for the entire TCS cohort ( $n = 95$ ). (b) Numbers of indels identified in microsatellite unstable (MSI) and microsatellite stable (MSS) colorectal cancer samples sequenced by TCS. Individual samples are indicated by dots, where counts include indels only identified by at least two different variant detectors. Error bars show mean and standard deviation of indel counts, and \*\*\*\* denotes  $P < 0.0001$ . (c) Normalised mutational signature from colorectal cancer sample CRC\_4 (top), against signature 14 from the COSMIC database (20, 21) (bottom). (d) Normalised mutational signature from colorectal cancer sample CRC\_3 (top), against signature 18 from the COSMIC database (20, 21) (bottom). (e) Normalised mutational signature from colorectal cancer sample CRC\_16 (top), against signature 16 from the COSMIC database (20, 21) (bottom).

**Figure 5 – Search for putative driver variants in target capture sequencing (TCS) data.** Quantile-quantile plots produced by OncodriveFML (28), showing the expected and observed distribution of functional somatic variant bias  $P$ -values (a) coding exons of the colorectal cancer-associated genes sequenced and (b) all sequenced regions, excluding coding exons from sequenced colorectal cancer-associated genes. Dots represent different sequenced regions, where dots with a lighter colour are regions for which the number of mutated samples did not reach the minimum required to perform the multiple testing correction. Sequenced regions identified as significant are indicated (labels in red:  $q$ -value  $< 0.1$  and labels in green:  $q$ -value  $< 0.25$ ). (c) Snapshot from UCSC Genome Browser (51), indicating the location of indels within the putative promoter of *MTERFD3*. Transcription factor binding data is shown via the “Transcription Factor ChIP-seq (161 factors)” track from ENCODE (32). A grey box indicates peak clusters of transcription factor occupancy, where the darkness of each box signifies the maximum signal strength observed in any cell line contributing to that cluster. A green highlight within the box designates the site of the highest scoring canonical motif for the transcription factor indicated, via Factorbook (31) annotations. HCT-116 (human colon cancer cell-line) H3K4me3 chromatin immunoprecipitation sequencing (ChIP-seq) and DNase I hypersensitivity sequencing (DNase-seq) data are also shown.

## Supporting Information Figure Legends

**Figure S1 – Variant allele frequency (VAF) and mutation validation by Sanger sequencing.** (a) Violin plot depicting the VAFs of all single nucleotide somatic variants identified from TCS data (pre-filter) and only variants with  $\text{VAF} \geq 8.5\%$  (VAF-filter). The plot was produced using the ggplot2 R package (47), where the shape indicates the probability density of the data, with mean (dot) and standard deviation (line) indicated. (b-c) Sequencing traces from Sanger sequencing of genomic DNA from the samples named, showing validation of (b) a somatic deletion and (c) four somatic single nucleotide variants. Sequencing traces are visualised using Geneious version 10.2.2 (<http://www.geneious.com>; (52)).

**Figure S2 – Coverage statistics for whole-genome sequencing (WGS) and target capture sequencing (TCS).** (a) Average per sample TCS read coverage at sequenced bases in cancer (top) and matched normal (bottom) samples. Red bars indicate individual samples sequenced by TCS ( $n = 95$ ). Average coverage across TCS samples is shown by a black dotted line, and average coverage in the WGS sample is shown by a blue dotted line. (b-f) Percentage of bases with given read coverage in cancer (top) and matched normal (bottom) samples in (b) promoters, (c) DNase I hypersensitive (DHS) sites, (d) long non-coding RNAs (lncRNAs), (e) coding exons and (f) microRNAs (miRNAs). Data is plotted in bins spanning 50 reads, where the number on the x-axis indicates the lower edge of the bin (inclusive). The box plot shows the actual value for WGS data (blue;  $n = 1$ , CRC\_1), and the mean and standard deviation across samples in the TCS cohort (red;  $n = 95$  samples).

**Figure S3 – Comparison of somatic variants detected from whole-genome sequencing (WGS) and target capture sequencing (TCS) data.** (a) Normalised mutational signatures derived from CRC\_1 (top), compared against signature 10 from the COSMIC database (20, 21) (bottom). Signatures are shown for mutations from TCS (left) and WGS (right) data. (b-c) Read coverage in cancer and matched normal sequencing data for bases containing somatic variants detected in colorectal cancer sample CRC\_1. Graphs show (b) data from TCS for WGS-unique and shared mutations, and (c) data from WGS for TCS-unique and shared mutations. Box plots indicate mean and standard deviation of read coverage, where \*\*\*\* denotes  $P < 0.0001$ .

**Figure S4 – Germline variants and mutational signatures from samples in the target capture sequencing (TCS) cohort.** Snapshot of sequencing reads by TCS from matched normal samples of (a) CRC\_4 and (b) CRC\_3. Reads are viewed using the Integrative Genomics Viewer (IGV) (45, 46), with gene transcripts indicated. (c) Normalised mutational

signatures by TCS (top), against signature 18 from the COSMIC database (20, 21) (bottom) for samples CRC\_19 (left), CRC\_20 (middle) and CRC\_26 (right).

**Figure S5 – Genomic locus harbouring deletions in the *MTERFD3* putative promoter, and validation by Sanger sequencing.** (a) Sequencing traces from Sanger sequencing of genomic DNA of the samples named, depicting validation of the three indels within the *MTERFD3* putative promoter. Sequencing traces are visualised using Geneious version 10.2.2 (<http://www.geneious.com>; (52)). (b) Snapshot from UCSC Genome Browser (51), indicating deletions (indels) within the putative promoter of *MTERFD3*, alongside chromatin immunoprecipitation sequencing (ChIP-seq) data for the transcription factors with motifs disrupted. Boxes contain the reference DNA sequence, with the deleted nucleotides marked by an orange box. Transcription factor binding motifs are shown from Factorbook (31), where a green bar depicts the span of the motif across the DNA sequence.

*Please refer to excel document for Supporting Information tables and table legends.*

# Figure 1

**a** Region types sequenced by target capture sequencing (TCS)

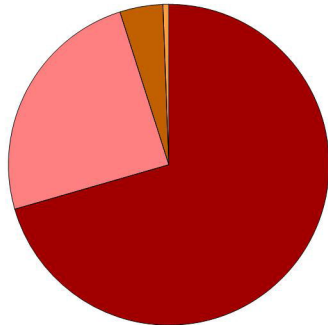

Total region size: 35,726,928 nucleotides

- 70.53% Promoter regions
- 24.54% DNase I Hypersensitivity (DHS) sites
- 4.34% Long non-coding RNAs (lncRNAs)
- 0.58% Coding exons
- 0.01% MicroRNAs (miRNAs)

**c** Mutation rates per sample ( $n = 95$ ) in target capture sequenced (TCS) regions

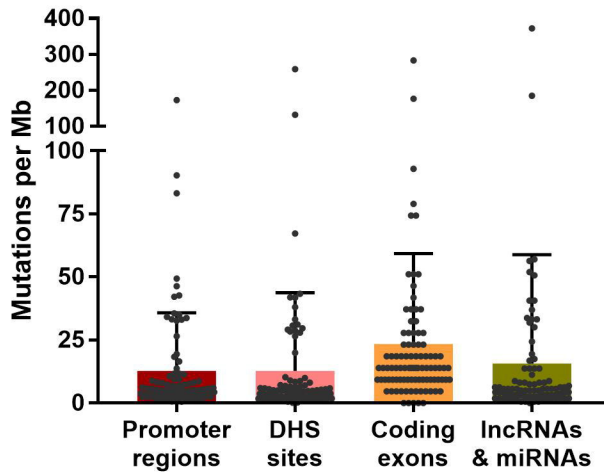

**b** Target capture sequencing (TCS)

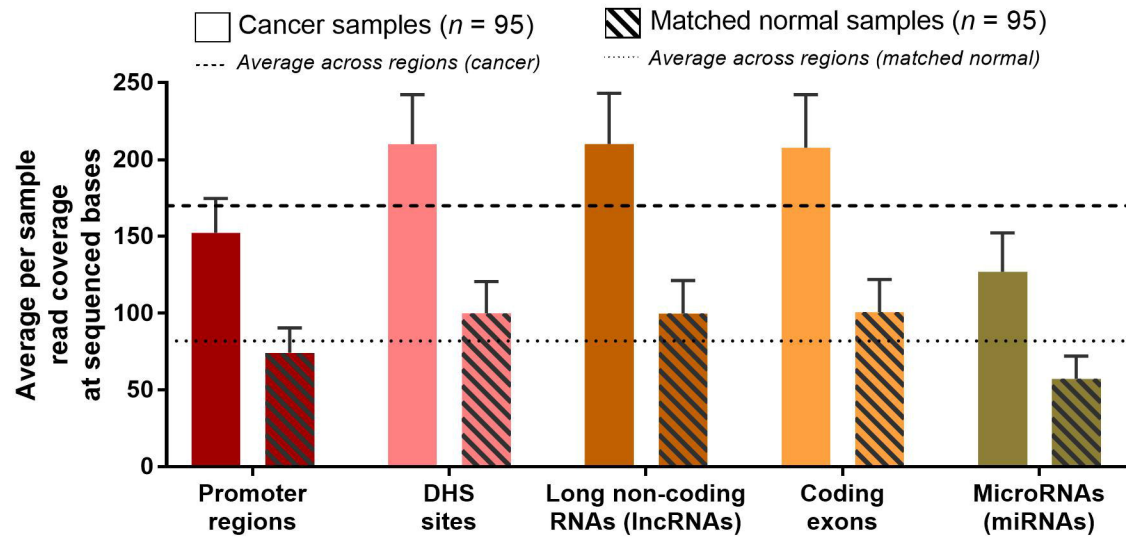

**d** Colorectal cancer subtypes: Microsatellite unstable (MSI), POLE exonuclease domain mutant, Microsatellite stable (MSS)

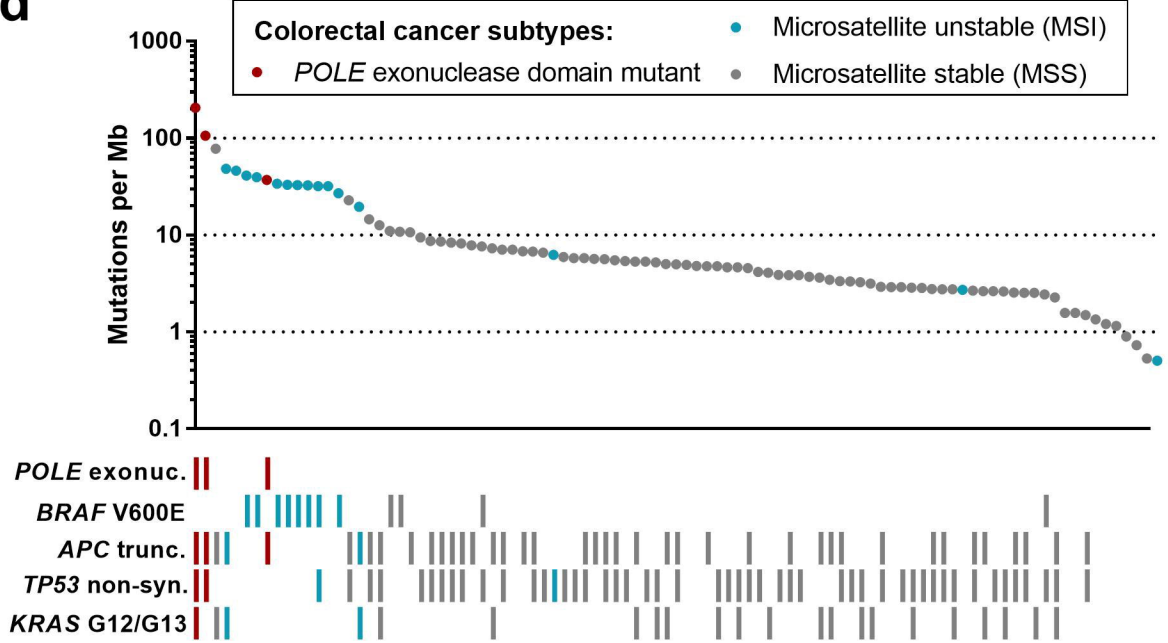

# Figure 2

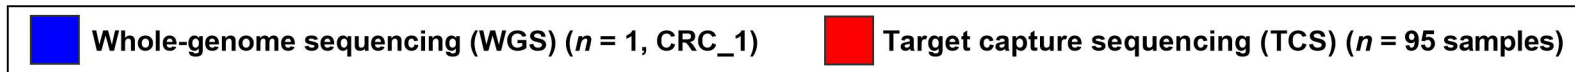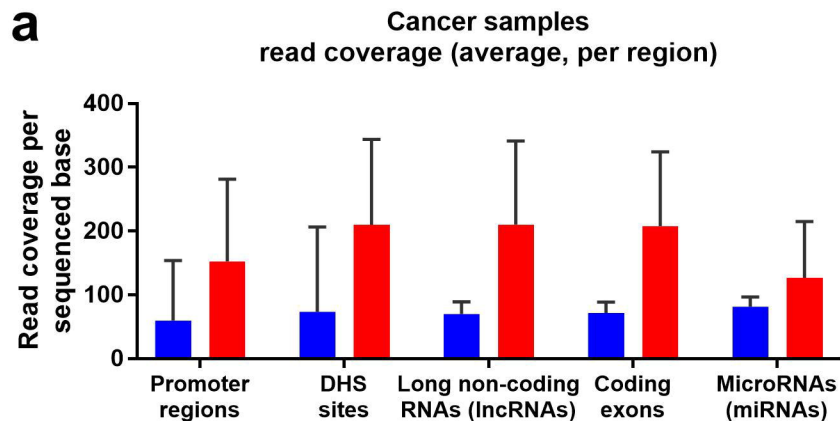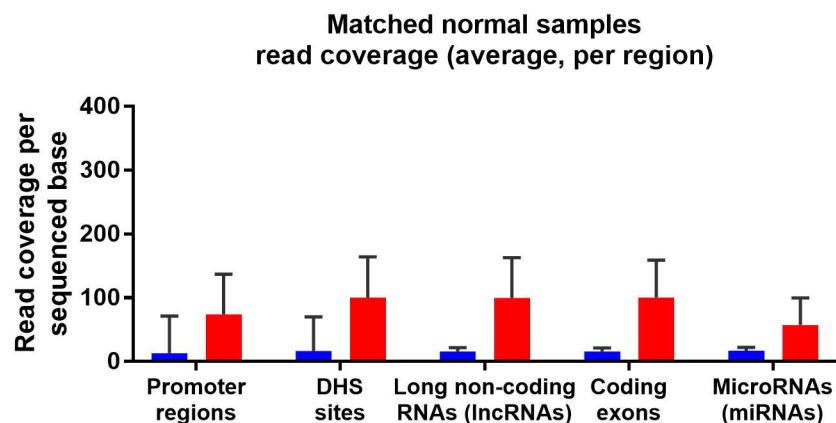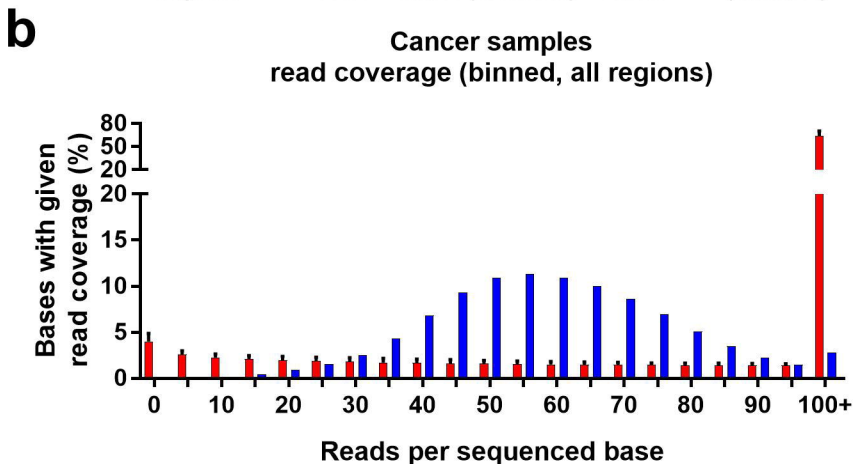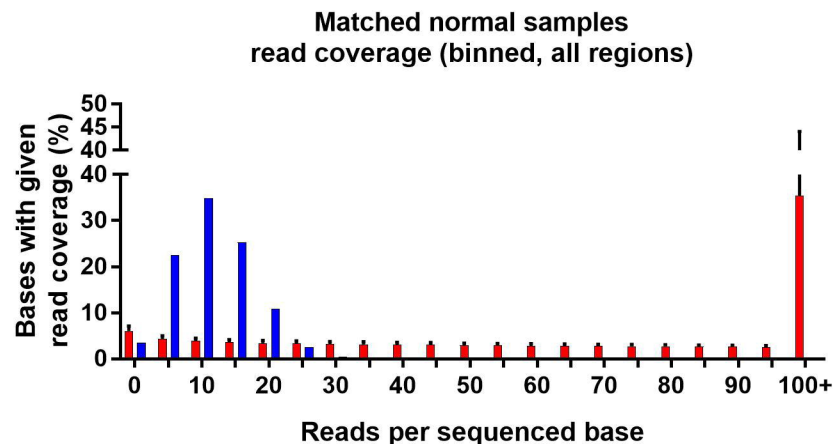

# Figure 3

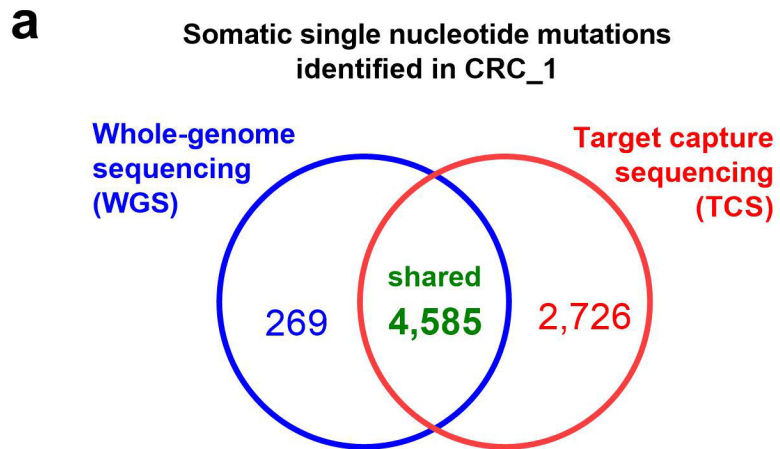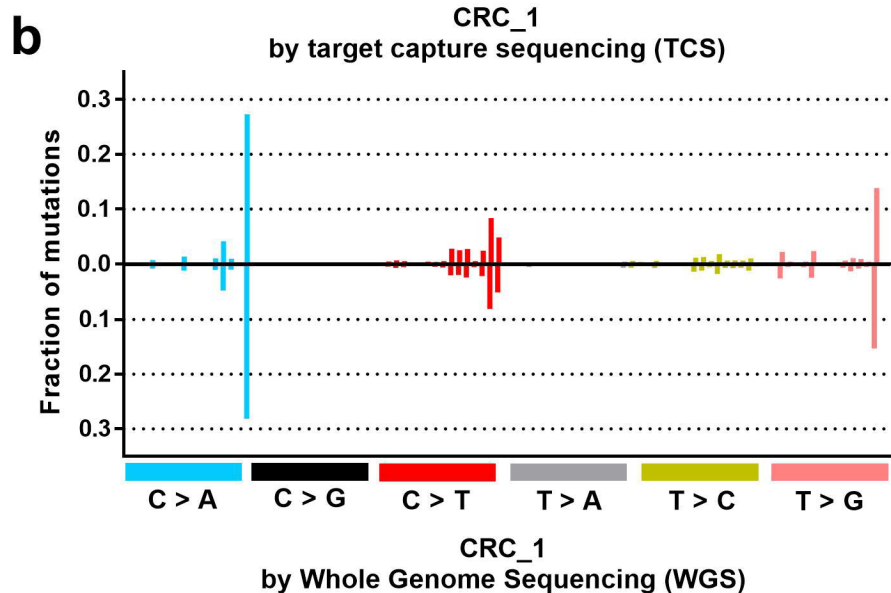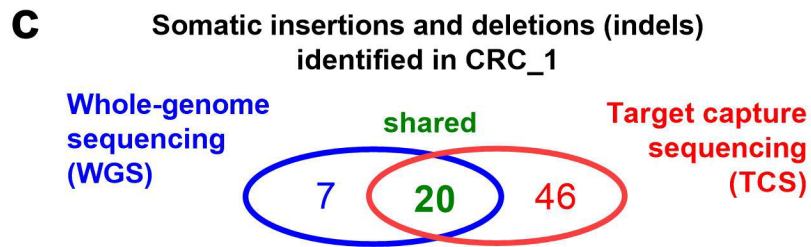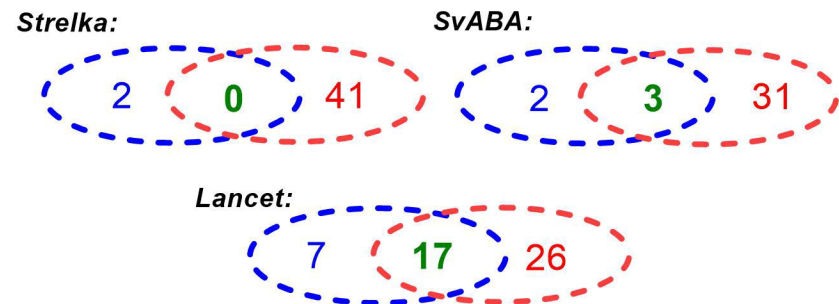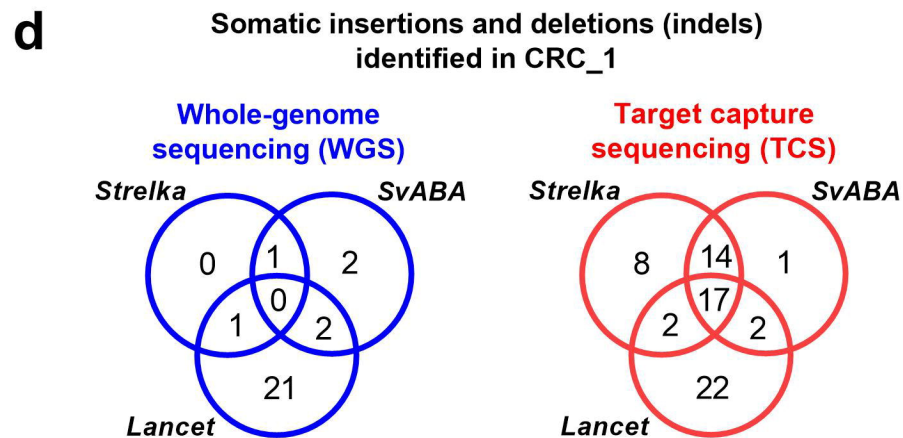

# Figure 4

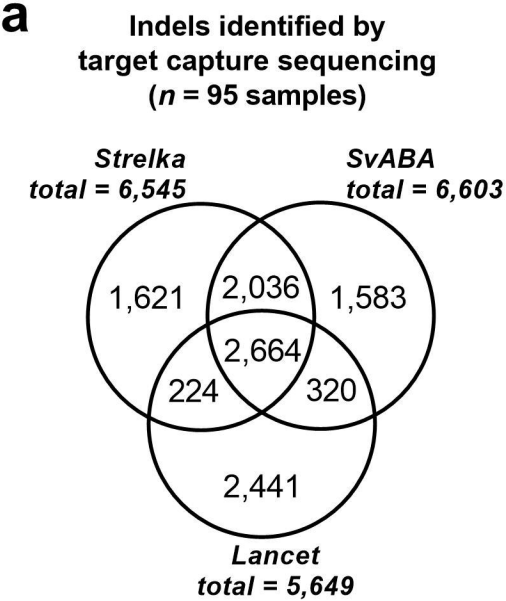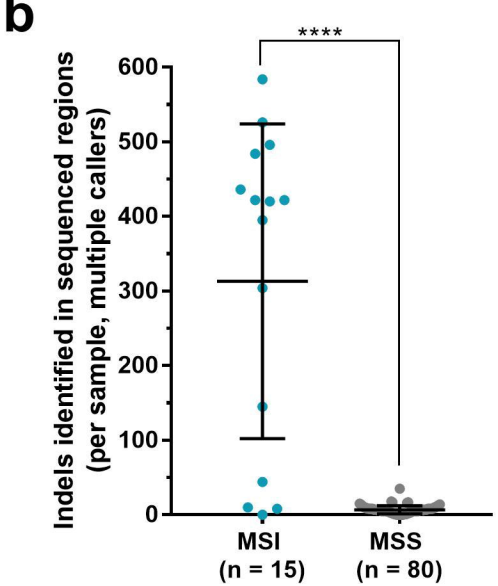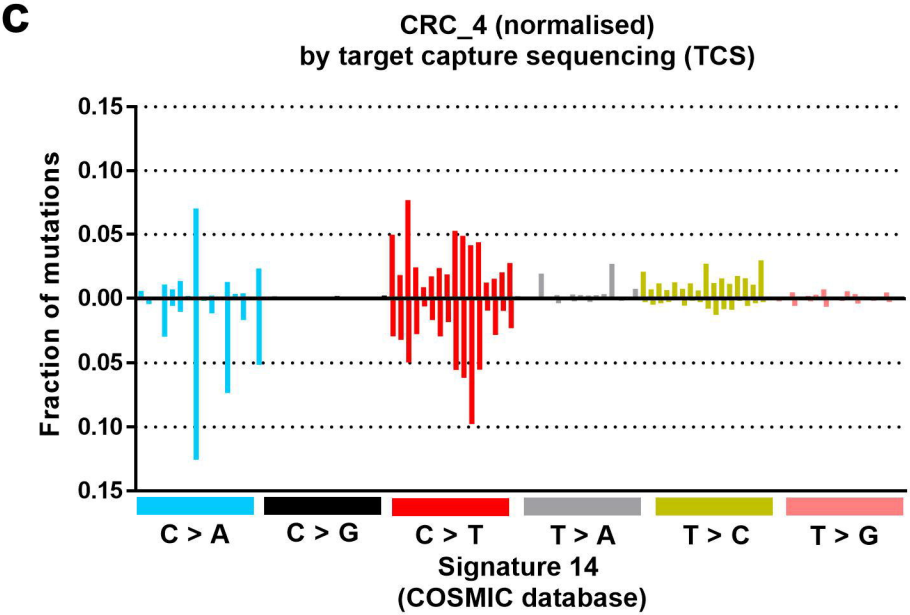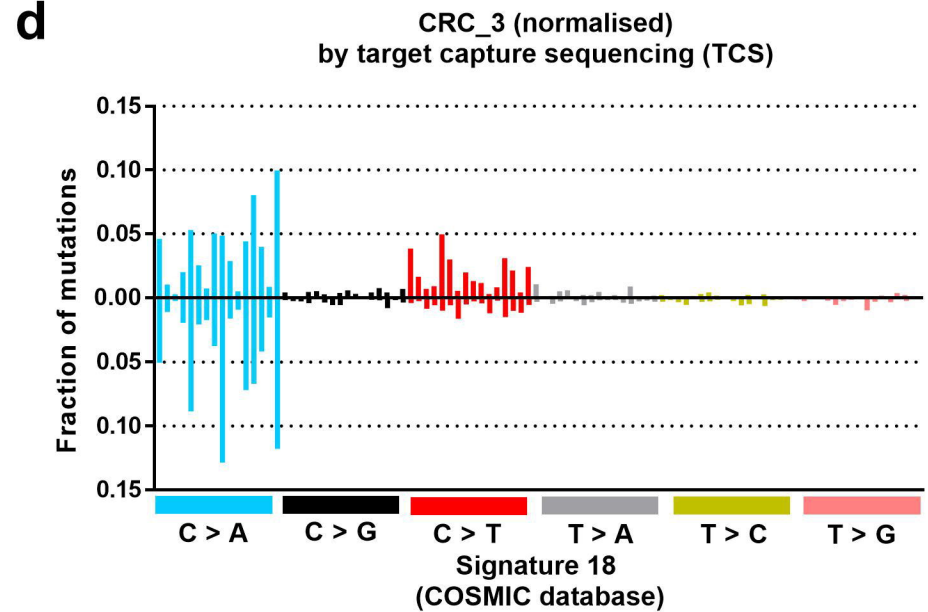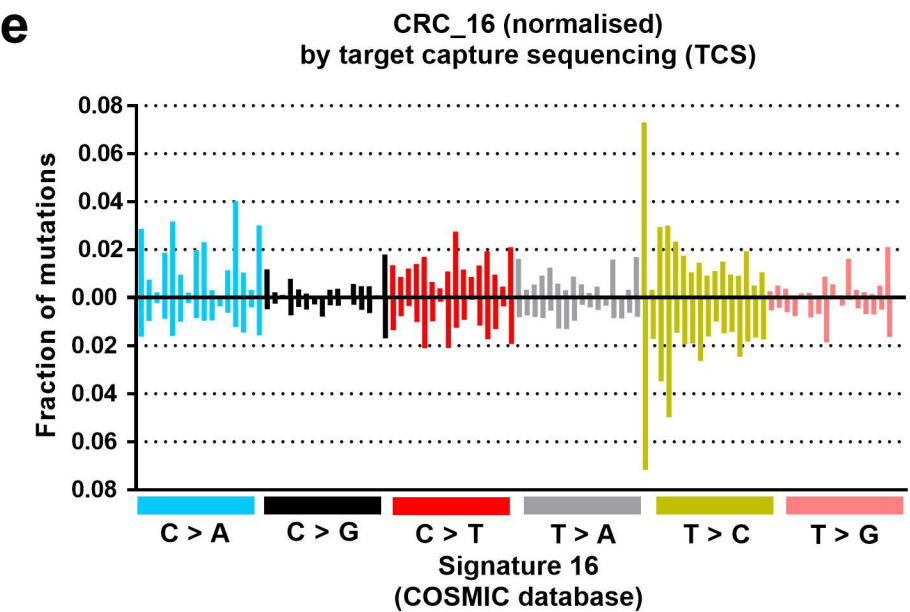

# Figure 5

**a** OncodriveFML output featuring only coding exons

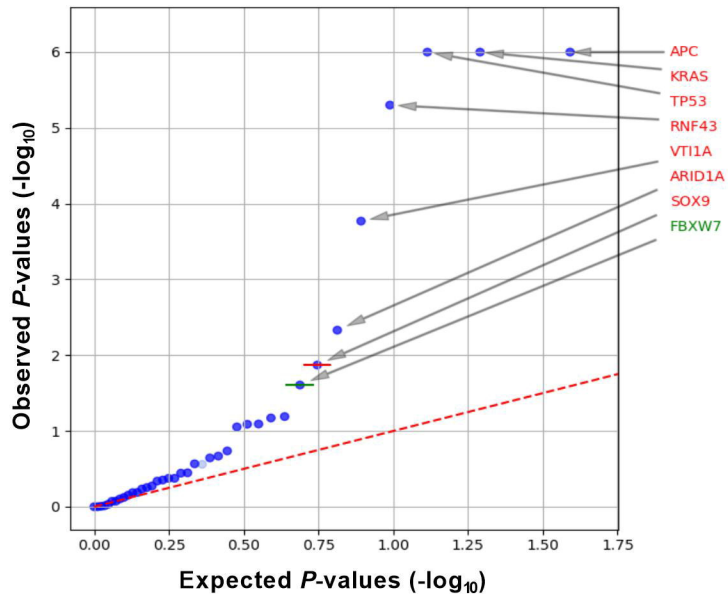

**b** OncodriveFML output featuring sequenced regions, excluding coding exons

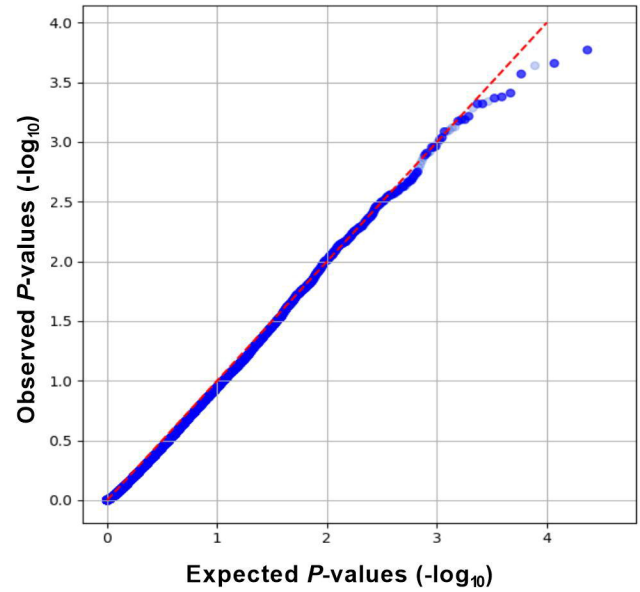

**c** chr12:107,378,500-107,382,500

*region of interest harbouring indel mutations*

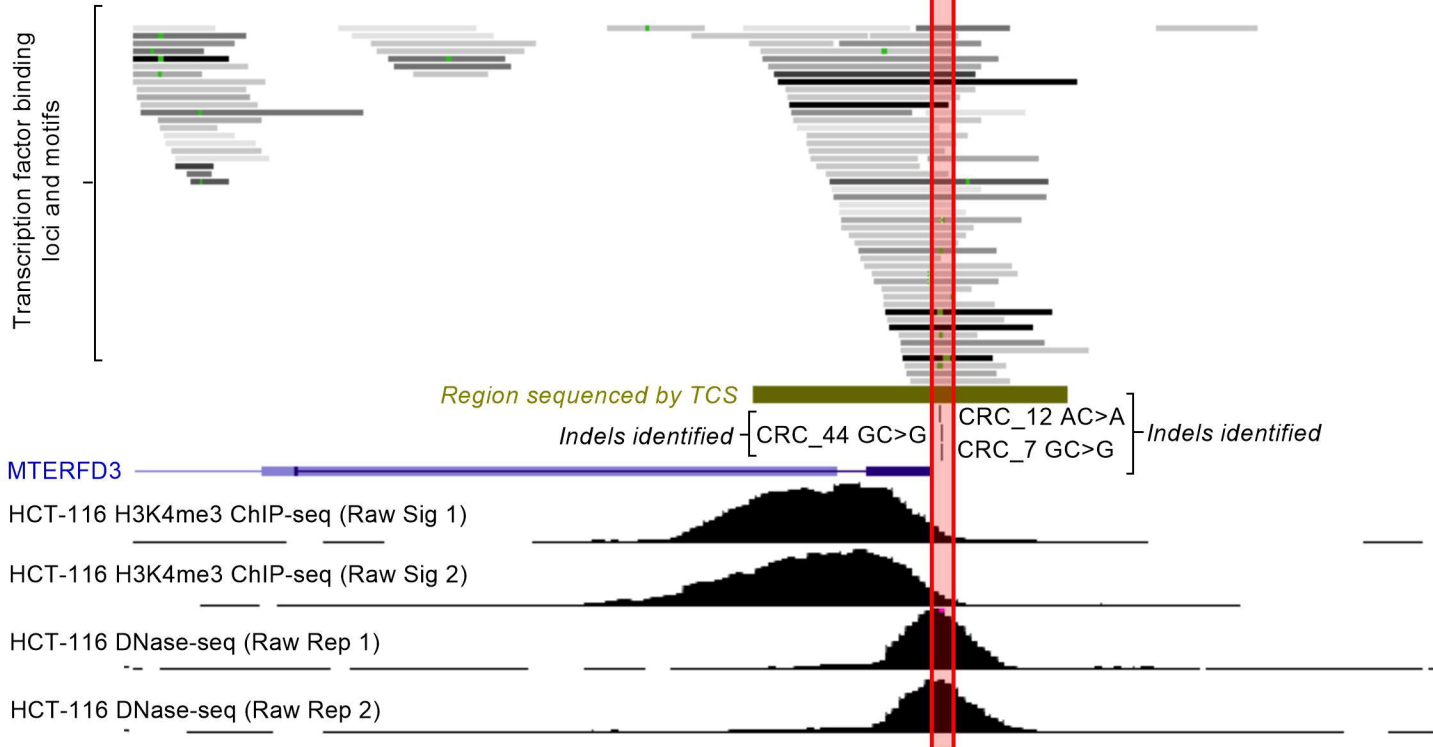

Source: http://biorxiv.org/content/10.1101/249300v1.full.pdf
